# Supplementary material
Source: Research Square preprint supplement (doi:10.21203/rs.3.rs-9267894/v1)
Supplement: Supplementary file 1 [file 89a9ef2782f334bbdf556748.xlsx]

## Sheet: Table S1
Table S1 the MFVD values of 200 chrythesanmum accessions
No.	Variety or code	MFVD	No.	Variety or code	MFVD	No.	Variety or code	MFVD
1	Amadea	0.215	68	Nannong Doubao	0.255	135	Mustard	0.4
2	Ahuafei	0.24	69	Nannong Zipingpang	0.305	136	Culm	0.445
3	Radost	0.55	70	Nannong Baifengwo	0.465	137	Wood Star	0.69
4	Qifengche	0.29	71	Nannong Yupingpang	NA	138	Barca Red	0.71
5	Baipenghua	0.555	72	Nannong Ruyi	0.435	139	Sei No Kosai	0.515
6	Country	NA	73	Nannong Lvyin	0.36	140	Nantongfen	NA
7	Zembla Sunny	0.525	74	Nannong Chengpingpang	0.82	141	D126	0.615
8	Lollipop	0.35	75	Nannong Jinniukou	NA	142	Pip	NA
9	Dante	0.355	76	Nannong Baipingpang	NA	143	D350	0.27
10	Nannong Bingxue	0.33	77	Yingxiong	0.395	144	Meiguohong	0.635
11	Nannong Feiyun	0.3	78	Nannong Jinpingpang	0.315	145	Belicia	NA
12	Nannong Luyue	0.51	79	Bonbon Pink	0.44	146	QD23-71	0.595
13	Nannong Hengjun	0.365	80	Bonbon Champagne Pink	NA	147	11160	0.4
14	Nannong Xuankui	0.46	81	Bonbon Dark	0.64	148	12160	0.42
15	Nannong Wanying	0.63	82	Nannong Lvdong	0.26	149	Rossano Dark	0.715
16	Nannong Lixue	0.55	83	Nannong Lvfeng	0.41	150	Rossano Charlotte	0.455
17	Nannong Kaige	0.44	84	Avron	0.525	151	Rossano Orange	0.51
18	Nannong Yunque	0.705	85	Healing	0.48	152	QD23-80	0.515
19	Nannong Bianlian	0.745	86	Bonbon Xinhuang	0.595	153	Jinhong	0.625
20	Nannong Zhuilv	0.53	87	Bonbon Orange	0.405	154	HJ1hao	NA
21	Nannong Huangjinjia	0.61	88	Escama	0.42	155	Seino lssei	0.515
22	Nannong Bingjie	0.59	89	Ganache	0.405	156	Seiko Eizan	0.605
23	Nannong Hongyan	NA	90	Cronos	0.185	157	Seiko komei	0.69
24	Nannong Guolicheng	0.475	91	Momokoo	0.315	158	Seiko Kogyoku	0.565
25	Nannong Dianshuang	0.495	92	Anastasia Pink	0.235	159	Qinhuai Jinhui	0.52
26	Nannong Nuanyang	0.395	93	Anastasia White	0.215	160	QD3-101	0.65
27	Nannong Liebo	0.55	94	Anastasia Dark Green	0.29	161	QD3-102	NA
28	Nannong Guilian	0.485	95	Anastasia Sunny	0.17	162	QD3-103	0.62
29	Nannong Lifeng	0.495	96	Anastasia Orange	0.195	163	QD3-104	0.7
30	Nannong Yanzhimei	0.45	97	Chispa	0.29	164	QD3-105	0.665
31	Nannong Xiaocaomei	0.695	98	Cuixin	0.245	165	QD3-107	0.73
32	Nannong Bingqilin	0.76	99	Chispa Golden	0.215	166	QD3-108	0.36
33	Nannong Xuefeng	0.735	100	Huanglvguan	NA	167	QD3-109	0.32
34	Nannong Huangguan	0.685	101	Chispa Orange	0.36	168	QD3-110	0.415
35	Nannong Xiaojinxing	0.62	102	Xuesongyue	0.185	169	QD3-113	0.51
36	Nannong Yilv	0.44	103	Lvcui	0.14	170	QD3-114	0.405
37	Nannong Doulv	0.665	104	Anastasia Bronze	0.255	171	QD3-116	0.545
38	Nannong Daixue	0.48	105	Jinzhua	0.685	172	QD3-117	0.51
39	Nannong Binfen	0.525	106	Fuego	0.29	173	QD3-118	0.315
40	Nannong Hengyun	0.595	107	Shiyuehuangzhong	0.515	174	QD3-119	0.45
41	Nannong Songmang	0.445	108	Yuehuang	0.335	175	QD3-121	0.185
42	Nannong Wujin	0.28	109	Marrow	0.245	176	QD3-122	0.26
43	Nannong Lifengche	0.53	110	Huangyu	0.2	177	QD3-123	0.36
44	Nannong Xiufengche	0.515	111	Bailongzhua	0.38	178	QD3-125	0.4
45	Nannong Fenmo	0.505	112	Ziguan	0.42	179	QD3-127	0.42
46	Nannong Fentuanzi	0.505	113	Shunfa	0.63	180	QD3-128	0.3
47	Nannong Huangpingpang	0.59	114	Qingchuyulan	0.525	181	Qinhuai Bailu	0.16
48	Chispa Purple	0.505	115	Huangqieju	0.34	182	Qinhuai Zixiuqiu	0.35
49	Jinba	0.66	116	Zembla Brasil	0.32	183	Angelina	0.34
50	Qinhuai Chunxue	0.605	117	Wuming9	0.16	184	QD4-3	0.405
51	Qinhuai Xuelian	0.585	118	Jingdian	0.14	185	Sunny	0.48
52	Qinhuai Mocha	0.355	119	Hongri	0.49	186	Supernova Yellow	0.545
53	Posuo Nufang	0.33	120	Nannong Yulian	0.59	187	QD4-6	NA
54	Qixia Chunyu	NA	121	Nannong Danzhuang	0.57	188	Jingxinghuaxiang	0.515
55	Qixia Yidianying	NA	122	Nannong Baiyu	0.325	189	Tehuangrongcai	0.285
56	Lvyitianshi	NA	123	Seiko No Makoto	0.37	190	Huanghuafushi	0.415
57	Guanghangong	0.57	124	Qinhuan Chuxue	0.4	191	Jingxingdefeng	0.285
58	Nannong Yinshan	0.505	125	Zembla Lime	0.44	192	Jingdebo	0.705
59	Qinhuai Fuyun	0.51	126	Qinhuai Yuhe	0.555	193	Jingxingrongshen	0.355
60	Nannong Silv	0.255	127	Venic	0.545	194	Jingxingdesheng	0.545
61	Bonbon Yellow	0.445	128	Arctic Queen	0.555	195	Jingdezhen	0.365
62	Bonbon White	0.325	129	4763	0.49	196	Jingdeguangcai	0.54
63	Nannong Chadian	0.28	130	Lvbianqiu	0.62	197	Jingxingguangshou	0.415
64	Bonbon Chartreuse	0.205	131	Qinhuai Baicha	0.435	198	Tema	0.45
65	Feeling Green Dark	0.36	132	Qinhuai Diancui	0.365	199	Jingxingdecheng	0.48
66	Feeling Sunny	0.37	133	Qinhuai Huihuang	0.59	200	Lanmaolvyin	0.725
67	Feeling White	0.245	134	Qinhuai Chayuan	0.415
Note: the NA means no MFVD value

## Sheet: Table S2
Table S2 The information of measured traits
Traitsa	Description
F_MFVD	membership function value of drohgt
F_WI	wilting index in drought stress condition
F_PH_T	plant height in drought stress condition
F_SFW_T	stem fresh weight in drought stress condiition
F_SDW_T	stem dry weight in drought stress condiition
F_PH_CK	plant height in well-watered condition
F_SFW_CK	stem fresh weight in well-watered condition
F_SDW_CK	stem dry weight in well-watered condiition
F_PHI	F_PH_T/F_PH_CK
F_SFWI	F_SFW_T/F_SFW_CK
F_SDWI	F_SDW_T/F_SDW_CK
A_MFVD	membership function value of drohgt after rehydration
A_WI	wilting index after hydration
A_PH_T	plant height after hydration
A_SFW_T	stem fresh weight after hydration
A_SDW_T	stem dry weight after hydration
A_PH_CK	plant height in well-watered condition
A_SFW_CK	stem fresh weight in well-watered condition
A_SDW_CK	stem dry weight in well-watered condiition
A_PHI	A_PH_T/A_PH_CK
A_SFWI	A_SFW_T/A_SFW_CK
A_SDWI	A_SDW_T/A_SDW_CK
MFVD	the mean value of F_MFVD and A_MFVD
Note: the perfix of ‘F_’ and ‘A_’respectively reprensents the drought condition, and after hydration , while the suffix '_CK' and '_T' means the treatment groups and control check groups.

## Sheet: Table S3
Table S3 Names and sequences of primers used in this study
Usage	primer name	Sequence (5' to 3')
qRT-PCR	CmEF1α-F	TTTTGGTATCTGGTCCTGGAG
	CmEF1α-R	CCATTCAAGCGACAGACTCA
	bHLH112-F	CTGATACAGCGTCGGTTCTC
	bHLH112-R	TGTAGTCGTTGCATGGTAGC
	SAUR51-F	ACAAGCAGCACTTTTGAAGC
	SAUR51-R	TATGACGTAGCGGCTCCTAT
	NLP6-F	TTACTGTCTGGAAACGCTGC
	NLP6-R	TGCGCTCCTCCTCTAAAACA
	PIF3-F	GCGCCTCTTTTGTTTTCTCC
	PIF3-R	GTGGATCCCGACAGTTCTTC
	BR6OX2-F	GAAGCTTGGATGCGCAAAAT
	BR6OX2-R	TGTCTCCTCCCACTTCTTCC
	CYP72A15-F	GGTAACCAAGGGACAGGTTG
	CYP72A15-R	TGGAGCGTGTGAATATGACG
	PAP2-F	TCCTAATGGAATTCGCAGGC
	PAP2-R	GAACATCGCCAACAAGCATC

## Sheet: Table S4
Table S4 Summary of significant and suggested QTNs for drought tolerance-related traits in single environment using 3VmrMLM model
Traits	QTNs	Position (bp)	LODa	Addb	Domc	Variance	R2(%)d	P value	Significance
F_MFVD	Chr1__247024312	247024312	13.3738	0.0287		0.0006	2.307	4.23748e-15	SIG
F_MFVD	Chr2__44749723	44749723	9.5592	-0.0235		0.0003	1.3309	3.25003e-11	SIG
F_MFVD	Chr2__68509602	68509602	29.0617	-0.0031	0.0887	0.0017	7.0965	8.69742e-30	SIG
F_MFVD	Chr2__106053210	106053210	8.8692	0.0007	0.0484	0.0004	1.7407	1.35251e-09	SIG
F_MFVD	Chr2__148006335	148006335	11.8586	0.0167	0.0298	0.0003	1.2945	1.38627e-12	SIG
F_MFVD	Chr2__159676764	159676764	19.0358	0.0081	-0.0479	0.0007	3.1091	9.22379e-20	SIG
F_MFVD	Chr5__124420703	124420703	7.3595	0.0061	-0.0248	0.0002	0.8819	4.37296e-08	SIG
F_MFVD	Chr8__259280190	259280190	9.5471	0.0224		0.0005	1.9557	3.34417e-11	SIG
F_MFVD	Chr10__178304233	178304233	13.8713	0.0383	-0.0008	0.0006	2.656	1.34644e-14	SIG
F_MFVD	Chr11__221663070	221663070	5.8827	0.0177		0.0003	1.3064	1.94224e-07	SUG
F_MFVD	Chr11__222752025	222752025	10.3867	-0.0244		0.0003	1.4157	4.64597e-12	SIG
F_MFVD	Chr13__134832236	134832236	31.6053	-0.0094	-0.0544	0.0004	1.7305	2.48829e-32	SIG
F_MFVD	Chr13__174654125	174654125	21.0355	0.0092	0.0671	0.0008	3.2497	9.23116e-22	SIG
F_MFVD	Chr13__259707859	259707859	15.7116	-0.0332		0.0007	2.9075	1.80031e-17	SIG
F_MFVD	Chr14__83009628	83009628	18.2075	0.0451	0.0089	0.0007	2.9667	6.21124e-19	SIG
F_MFVD	Chr15__3604139	3604139	11.059	-0.0058	0.0704	0.0007	2.9176	8.73858e-12	SIG
F_MFVD	Chr16__111593120	111593120	21.6244	0.0262	0.0617	0.0002	1.023	2.37879e-22	SIG
F_MFVD	Chr16__173174719	173174719	24.6697	0.0498	0.0054	0.0005	2.1803	2.1439e-25	SIG
F_MFVD	Chr22__86900701	86900701	13.1527	0.0014	0.0793	0.0007	3.0428	7.04329e-14	SIG
F_MFVD	Chr22__160410495	160410495	20.5305	-0.0235	-0.0573	0.0003	1.094	2.95305e-21	SIG
F_MFVD	Chr24__282056025	282056025	18.8793	0.0334		0.0008	3.4383	1.11901e-20	SIG
F_MFVD	Chr25__186988161	186988161	12.0306	-0.0297	0.0096	0.0003	1.0911	9.32978e-13	SIG
F_MFVD	Chr27__161373885	161373885	5.8217	0.0185		0.0003	1.4079	2.24616e-07	SUG
F_WI	Chr1__234987290	234987290	5.274	0.1514	-0.1052	0.0156	1.3456	5.32385e-06	SUG
F_WI	Chr2__106053210	106053210	17.0614	-0.0871	-0.5017	0.036	3.0979	8.69349e-18	SIG
F_WI	Chr2__217854146	217854146	5.6976	-0.2018	0.0064	0.0169	1.4551	2.00744e-06	SUG
F_WI	Chr6__268784715	268784715	26.3765	0.326		0.0494	4.2534	3.02439e-28	SIG
F_WI	Chr7__253864058	253864058	11.5342	-0.079	-0.3965	0.0159	1.3692	2.92565e-12	SIG
F_WI	Chr10__302208185	302208185	13.8912	0.0709	0.4566	0.0259	2.2293	1.28628e-14	SIG
F_WI	Chr12__36765745	36765745	27.24	0.3603	0.1027	0.0092	0.7949	5.76786e-28	SIG
F_WI	Chr13__269012131	269012131	9.0456	0.0662	-0.238	0.0181	1.5574	9.01058e-10	SIG
F_WI	Chr17__338559401	338559401	11.2864	0.0361	0.3947	0.0232	1.9984	5.17651e-12	SIG
F_WI	Chr18__333348032	333348032	34.1555	0.3148	0.465	0.0105	0.9088	7.01054e-35	SIG
F_WI	Chr19__182192908	182192908	9.6272	-0.1661		0.0174	1.4966	2.76941e-11	SIG
F_WI	Chr22__44371565	44371565	10.1374	-0.171		0.0288	2.4773	8.34695e-12	SIG
F_WI	Chr22__160410502	160410502	30.7465	0.1642	0.5284	0.0337	2.9034	1.79736e-31	SIG
F_WI	Chr22__201784939	201784939	7.6199	-0.0541	0.3583	0.0217	1.8673	2.40091e-08	SIG
F_WI	Chr23__45962614	45962614	16.5592	0.2312		0.0239	2.0633	2.49259e-18	SIG
F_WI	Chr24__115918888	115918888	16.6357	-0.2345		0.0304	2.6203	2.08535e-18	SIG
F_WI	Chr25__211042485	211042485	16.0157	-0.4197	0.0144	0.0503	4.3316	9.65781e-17	SIG
F_WI	Chr26__95328912	95328912	13.9758	0.2165	-0.2291	0.0457	3.9388	1.05868e-14	SIG
F_WI	Chr26__173074026	173074026	8.4993	0.1012	-0.215	0.0236	2.0302	3.16943e-09	SIG
F_WI	Chr27__58232617	58232617	10.5457	0.1814		0.0159	1.3687	3.19839e-12	SIG
F_WI	Chr27__191718985	191718985	8.8324	-0.1661		0.0141	1.2111	1.79956e-10	SIG
F_PH_T	Chr1__35642352	35642352	10.268	0.5769	-0.0105	0.12	1.4123	5.40044e-11	SIG
F_PH_T	Chr2__115624958	115624958	10.3012	-0.2834	0.4974	0.1453	1.7097	5.00269e-11	SIG
F_PH_T	Chr2__254177371	254177371	18.6689	-0.1188	0.7087	0.1653	1.9451	2.14667e-19	SIG
F_PH_T	Chr3__37214369	37214369	11.4786	0.4102		0.1448	1.7036	3.58345e-13	SIG
F_PH_T	Chr3__147013477	147013477	7.8498	-0.3332		0.106	1.2478	1.82834e-09	SIG
F_PH_T	Chr4__193879101	193879101	27.14	0.4246	1.0916	0.1062	1.2493	7.26051e-28	SIG
F_PH_T	Chr6__189413986	189413986	8.0253	0.345		0.1119	1.3169	1.208e-09	SIG
F_PH_T	Chr8__167876449	167876449	14.6407	0.62	0.1861	0.0917	1.0785	2.28979e-15	SIG
F_PH_T	Chr9__109461294	109461294	9.4475	0.3869		0.0695	0.8183	4.22708e-11	SIG
F_PH_T	Chr10__153834649	153834649	9.5664	0.7623	0.1524	0.0888	1.0444	2.7159e-10	SIG
F_PH_T	Chr11__66657185	66657185	25.769	-0.9978	-0.2342	0.341	4.0121	1.70581e-26	SIG
F_PH_T	Chr11__92152031	92152031	16.1323	0.5144		0.1946	2.2895	6.7466e-18	SIG
F_PH_T	Chr12__176689569	176689569	16.0874	0.5461		0.1733	2.0396	7.49243e-18	SIG
F_PH_T	Chr12__203004016	203004016	8.689	-0.3077	0.6808	0.0959	1.1288	2.04794e-09	SIG
F_PH_T	Chr13__48038691	48038691	16.395	-0.1227	1.3636	0.2793	3.2862	4.0332e-17	SIG
F_PH_T	Chr13__242555416	242555416	10.0287	-0.2276	-0.4512	0.0476	0.5599	9.36748e-11	SIG
F_PH_T	Chr14__299621237	299621237	29.574	0.4896	1.4909	0.1693	1.9925	2.67353e-30	SIG
F_PH_T	Chr15__91009845	91009845	41.1863	-1.1996	-0.5884	0.1435	1.6887	6.53497e-42	SIG
F_PH_T	Chr16__165273239	165273239	19.5785	0.1763	0.7735	0.1233	1.4508	2.64364e-20	SIG
F_PH_T	Chr16__195387384	195387384	18.9617	0.3374	1.7229	0.1502	1.7667	1.09405e-19	SIG
F_PH_T	Chr18__280594146	280594146	13.0828	0.4796		0.1703	2.0034	8.36986e-15	SIG
F_PH_T	Chr18__303038021	303038021	11.823	0.1088	0.471	0.0238	0.2806	1.50472e-12	SIG
F_PH_T	Chr20__191224346	191224346	17.8281	0.2758	1.2678	0.1451	1.7079	1.4878e-18	SIG
F_PH_T	Chr22__3120400	3120400	16.934	0.5283		0.1281	1.5071	1.04034e-18	SIG
F_PH_T	Chr23__160757000	160757000	8.4527	0.0064	-1.344	0.1302	1.5322	3.52838e-09	SIG
F_PH_T	Chr25__19715157	19715157	15.6955	-0.2476	0.6316	0.1806	2.1249	2.0186e-16	SIG
F_PH_T	Chr27__139060124	139060124	36.533	1.2188	0.7212	0.1555	1.8299	2.93983e-37	SIG
F_SFW_T	Chr1__172692146	172692146	12.5969	-0.0516		0.0011	1.2111	2.60935e-14	SIG
F_SFW_T	Chr2__75090755	75090755	16.1227	-0.0091	-0.1454	0.0026	2.9073	7.54912e-17	SIG
F_SFW_T	Chr4__142485731	142485731	7.1531	-0.0044	0.1401	0.0015	1.7338	7.03282e-08	SIG
F_SFW_T	Chr5__103962112	103962112	19.8868	-0.1259	-0.0083	0.0046	5.2231	1.29993e-20	SIG
F_SFW_T	Chr6__202306747	202306747	28.5149	0.002	-0.1054	0.0025	2.8152	3.06278e-29	SIG
F_SFW_T	Chr9__190584534	190584534	11.3761	0.002	-0.0626	0.001	1.1029	4.21085e-12	SIG
F_SFW_T	Chr9__208481455	208481455	11.9331	0	0.1187	0.0022	2.4569	1.16771e-12	SIG
F_SFW_T	Chr10__168784455	168784455	11.2531	-0.0485		0.0012	1.3571	6.08165e-13	SIG
F_SFW_T	Chr11__63061828	63061828	18.4208	-0.0717	0.0405	0.0018	2.0578	3.80043e-19	SIG
F_SFW_T	Chr12__129706658	129706658	31.0426	-0.0179	-0.1797	0.005	5.6774	9.0904e-32	SIG
F_SFW_T	Chr13__156513002	156513002	20.8075	0.0678		0.002	2.3189	1.25912e-22	SIG
F_SFW_T	Chr15__276220311	276220311	7.7063	0.0415		0.0007	0.8285	2.56681e-09	SIG
F_SFW_T	Chr16__252301038	252301038	12.5391	-0.0271	0.1193	0.0026	2.9774	2.89324e-13	SIG
F_SFW_T	Chr19__49106337	49106337	21.2094	0.0167	-0.1022	0.0032	3.6979	6.18527e-22	SIG
F_SFW_T	Chr20__149614189	149614189	29.2655	-0.0302	-0.1798	0.0039	4.4939	5.43942e-30	SIG
F_SFW_T	Chr22__4949769	4949769	6.0422	0.062	-0.0049	0.0013	1.5357	9.07858e-07	SUG
F_SFW_T	Chr23__289149232	289149232	10.3769	-0.0452		0.0015	1.7213	4.75508e-12	SIG
F_SFW_T	Chr23__313463249	313463249	19.4854	-0.0691		0.0023	2.5795	2.72976e-21	SIG
F_SFW_T	Chr24__47631613	47631613	6.9158	0.0011	0.081	0.0011	1.2408	1.21468e-07	SIG
F_SFW_T	Chr25__128010319	128010319	15.4281	-0.039	0.0703	0.0027	3.1301	3.73627e-16	SIG
F_SFW_T	Chr26__188384371	188384371	11.1388	-0.0789	0.0387	0.0021	2.3907	7.27147e-12	SIG
F_SFW_T	Chr27__205227934	205227934	10.8627	0.0496	-0.0194	0.0012	1.3499	1.37308e-11	SIG
F_SDW_T	Chr2__238152344	238152344	8.794	0.0167	-0.0175	0.0003	2.0828	1.6082e-09	SIG
F_SDW_T	Chr3__226576441	226576441	18.2172	0.0254		0.0003	2.4104	5.23012e-20	SIG
F_SDW_T	Chr4__182437365	182437365	4.3769	0.0172	-0.0016	0.0001	1.0331	4.1999e-05	SUG
F_SDW_T	Chr5__107870925	107870925	21.1162	0.0178	0.0338	0.0003	2.4126	7.66695e-22	SIG
F_SDW_T	Chr5__152525167	152525167	23.5856	-0.0298		0.0004	2.8555	1.97385e-25	SIG
F_SDW_T	Chr6__26554634	26554634	31.3714	0.0509	0.017	0.0003	2.3863	4.26377e-32	SIG
F_SDW_T	Chr7__217703137	217703137	18.3298	0.0267		0.0004	2.7925	4.02396e-20	SIG
F_SDW_T	Chr11__126218915	126218915	11.1449	-0.0065	0.0306	0.0003	2.3422	7.16917e-12	SIG
F_SDW_T	Chr12__37964777	37964777	11.3013	0.0061	0.0339	0.0002	1.5039	5.00223e-12	SIG
F_SDW_T	Chr13__294992274	294992274	15.718	0.0238		0.0003	2.3476	1.77383e-17	SIG
F_SDW_T	Chr14__63091370	63091370	26.0185	-0.039	-0.0068	0.0003	2.6011	9.60335e-27	SIG
F_SDW_T	Chr14__198079938	198079938	16.9953	0.0326	0.0038	0.0002	1.6228	1.01244e-17	SIG
F_SDW_T	Chr16__125764264	125764264	35.8998	-0.0119	-0.0503	0.0004	3.2634	1.26339e-36	SIG
F_SDW_T	Chr17__34549067	34549067	13.7483	-0.0219		0.0003	2.0355	1.76512e-15	SIG
F_SDW_T	Chr19__23765722	23765722	11.7126	-0.0009	-0.0285	0.0002	1.4785	1.93993e-12	SIG
F_SDW_T	Chr19__121683257	121683257	11.6238	0.0284	0.0007	0.0002	1.7277	2.38055e-12	SIG
F_SDW_T	Chr20__77329081	77329081	13.0595	-0.0084	-0.0429	0.0002	1.6506	8.72917e-14	SIG
F_SDW_T	Chr20__178664936	178664936	23.6564	-0.0051	-0.0374	0.0003	1.9675	2.21061e-24	SIG
F_SDW_T	Chr21__183438133	183438133	10.0513	-0.0128	0.0238	0.0003	2.3825	8.89278e-11	SIG
F_SDW_T	Chr22__217026448	217026448	12.2044	-0.0217		0.0002	1.3346	6.54263e-14	SIG
F_SDW_T	Chr23__145159533	145159533	8.3339	-0.0102	0.0221	0.0002	1.701	4.63902e-09	SIG
F_SDW_T	Chr23__203860096	203860096	9.1782	0.0181		0.0002	1.2684	7.96751e-11	SIG
F_SDW_T	Chr25__22755357	22755357	9.851	-0.0177		0.0003	2.1742	1.63645e-11	SIG
F_SDW_T	Chr25__103279552	103279552	14.8283	-0.0001	0.0497	0.0004	3.1011	1.48669e-15	SIG
F_PH_CK	Chr2__141448311	141448311	21.2683	0.8179		0.4038	3.5676	4.31128e-23	SIG
F_PH_CK	Chr2__169048047	169048047	53.1167	-0.2802	1.6778	0.1488	1.3145	7.67908e-54	SIG
F_PH_CK	Chr3__241545273	241545273	27.7149	-0.1109	-1.3199	0.3962	3.5003	1.93249e-28	SIG
F_PH_CK	Chr4__284630740	284630740	10.9862	0.081	-0.7489	0.1684	1.4881	1.03334e-11	SIG
F_PH_CK	Chr5__34141690	34141690	37.7804	-1.255	-0.5314	0.1268	1.12	1.66341e-38	SIG
F_PH_CK	Chr7__5894702	5894702	11.4904	-0.1427	0.9635	0.2662	2.3516	3.23585e-12	SIG
F_PH_CK	Chr9__76628692	76628692	16.5097	0.6677		0.2641	2.3331	2.79767e-18	SIG
F_PH_CK	Chr9__80117750	80117750	9.789	-0.4877		0.1584	1.3998	1.89327e-11	SIG
F_PH_CK	Chr11__54182023	54182023	12.8677	0.1368	1.0973	0.2062	1.8215	1.35764e-13	SIG
F_PH_CK	Chr14__15620642	15620642	8.5311	0.4491		0.1307	1.1544	3.66079e-10	SIG
F_PH_CK	Chr14__299621237	299621237	36.7118	-1.2291	0.3019	0.4444	3.9265	1.9479e-37	SIG
F_PH_CK	Chr16__21249187	21249187	29.7549	0.1522	-1.031	0.1137	1.0049	1.76289e-30	SIG
F_PH_CK	Chr16__202193535	202193535	7.1595	-0.5984	0.1484	0.1404	1.2404	6.92983e-08	SIG
F_PH_CK	Chr16__218664996	218664996	19.5438	-0.9254	-0.354	0.0892	0.7883	2.86393e-20	SIG
F_PH_CK	Chr17__339244693	339244693	18.1044	0.0329	-1.0851	0.3079	2.7205	7.8746e-19	SIG
F_PH_CK	Chr18__16098777	16098777	17.4745	0.147	1.1095	0.2329	2.0581	3.35838e-18	SIG
F_PH_CK	Chr22__146457260	146457260	13.8718	-0.179	1.6831	0.3864	3.4138	1.3451e-14	SIG
F_PH_CK	Chr22__231181277	231181277	7.8512	-0.7001	-0.0843	0.1836	1.6224	1.40949e-08	SIG
F_PH_CK	Chr22__240074462	240074462	11.9875	0.5553		0.1887	1.6672	1.08744e-13	SIG
F_PH_CK	Chr23__235085399	235085399	5.8343	-0.2246	0.6023	0.1414	1.2491	1.46538e-06	SUG
F_PH_CK	Chr25__38860151	38860151	27.5408	1.1148	0.0612	0.2376	2.0991	2.88558e-28	SIG
F_PH_CK	Chr26__196077322	196077322	37.4189	-1.1527		0.5018	4.4337	2.31089e-39	SIG
F_SFW_CK	Chr1__60835462	60835462	11.1988	0.1854	0.0023	0.0083	1.5583	6.33258e-12	SIG
F_SFW_CK	Chr4__253186881	253186881	26.9641	0.0602	0.3625	0.0254	4.7499	1.08864e-27	SIG
F_SFW_CK	Chr4__258242160	258242160	4.5837	-0.1336	0.0248	0.0064	1.203	2.60882e-05	SUG
F_SFW_CK	Chr9__215049025	215049025	9.9779	-0.1557		0.0105	1.9697	1.21422e-11	SIG
F_SFW_CK	Chr14__84568405	84568405	5.9409	0.1649	0.0306	0.0084	1.5636	1.14625e-06	SUG
F_SFW_CK	Chr15__291210825	291210825	15.7772	0.0886	0.3728	0.0148	2.77	1.67255e-16	SIG
F_SFW_CK	Chr16__221254609	221254609	15.604	-0.1874		0.0186	3.4769	2.31454e-17	SIG
F_SFW_CK	Chr18__249741815	249741815	25.3546	-0.0312	0.4342	0.0506	9.4584	4.42942e-26	SIG
F_SFW_CK	Chr18__271613853	271613853	6.1937	0.1167		0.0093	1.7303	9.26317e-08	SIG
F_SFW_CK	Chr19__1003702	1003702	24.5026	0.2474		0.0373	6.9765	2.34552e-26	SIG
F_SFW_CK	Chr19__132152045	132152045	9.117	-0.1456		0.0152	2.8415	9.20248e-11	SIG
F_SFW_CK	Chr24__73908429	73908429	10.3532	-0.1504		0.0113	2.1091	5.02692e-12	SIG
F_SFW_CK	Chr24__252192381	252192381	9.6339	-0.1423		0.0142	2.6576	2.72618e-11	SIG
F_SFW_CK	Chr25__54102040	54102040	13.6401	0.2194	-0.0784	0.024	4.4842	2.29305e-14	SIG
F_SFW_CK	Chr25__91561955	91561955	13.3542	-0.0605	0.4269	0.0342	6.386	4.4286e-14	SIG
F_SFW_CK	Chr25__99272549	99272549	5.3696	-0.0091	0.1684	0.0074	1.3765	4.27209e-06	SUG
F_SFW_CK	Chr27__34606699	34606699	10.0955	0.0448	0.3952	0.0132	2.4689	8.03367e-11	SIG
F_SFW_CK	Chr27__196078990	196078990	21.858	0.0931	0.4499	0.0225	4.1994	1.38937e-22	SIG
F_SDW_CK	Chr2__83882442	83882442	15.8263	0.0214	0.0492	0.0005	1.9174	1.49361e-16	SIG
F_SDW_CK	Chr2__128403561	128403561	19.5617	-0.0453		0.0011	3.9971	2.28548e-21	SIG
F_SDW_CK	Chr2__237028334	237028334	17.6891	0.0471	-0.0233	0.001	3.807	2.04918e-18	SIG
F_SDW_CK	Chr4__203393342	203393342	7.6383	0.0253		0.0004	1.5878	3.01471e-09	SIG
F_SDW_CK	Chr8__227703142	227703142	27.2608	0.0646	-0.0091	0.0011	4.0806	5.49847e-28	SIG
F_SDW_CK	Chr11__184516226	184516226	25.5075	0.0708	0.0055	0.0012	4.6745	3.11494e-26	SIG
F_SDW_CK	Chr11__206128687	206128687	21.4474	0.0225	0.087	0.0008	3.1713	3.57579e-22	SIG
F_SDW_CK	Chr11__260512401	260512401	17.2612	0.0012	-0.0603	0.0009	3.5323	5.48874e-18	SIG
F_SDW_CK	Chr12__129903226	129903226	20.0661	-0.0449		0.0013	4.8625	7.06547e-22	SIG
F_SDW_CK	Chr14__84568405	84568405	5.585	0.0324	-0.0077	0.0005	1.7881	2.60165e-06	SUG
F_SDW_CK	Chr14__179983930	179983930	10.5276	-0.0348	0.0246	0.0006	2.2043	2.97024e-11	SIG
F_SDW_CK	Chr14__217665917	217665917	11.975	-0.0336		0.0007	2.5188	1.11975e-13	SIG
F_SDW_CK	Chr16__125764264	125764264	9.1833	0.0193	-0.0324	0.0006	2.2251	6.56146e-10	SIG
F_SDW_CK	Chr16__188001169	188001169	12.6684	-0.0057	-0.0527	0.0006	2.2242	2.14831e-13	SIG
F_SDW_CK	Chr18__57111697	57111697	18.5034	0.1005	0.023	0.001	3.6114	3.14288e-19	SIG
F_SDW_CK	Chr22__81618298	81618298	18.9732	0.0441		0.0007	2.4486	8.99426e-21	SIG
F_SDW_CK	Chr23__130597062	130597062	6.6337	-0.0236		0.0004	1.6443	3.25643e-08	SIG
F_SDW_CK	Chr25__183214918	183214918	9.7485	-0.0066	0.0584	0.0008	2.8639	1.78584e-10	SIG
F_SDW_CK	Chr27__148805349	148805349	16.8769	-0.0409		0.0013	4.9454	1.18857e-18	SIG
F_PHI	Chr3__114151860	114151860	13.1846	-0.0228		0.0003	2.8373	6.59564e-15	SIG
F_PHI	Chr3__236107475	236107475	11.5214	-0.0295	0.0035	0.0004	3.6287	3.0129e-12	SIG
F_PHI	Chr4__290250650	290250650	6.3167	-0.0005	0.0276	0.0002	1.3792	4.82562e-07	SUG
F_PHI	Chr6__269079027	269079027	11.7613	-0.0266	0.0086	0.0003	2.6094	1.7342e-12	SIG
F_PHI	Chr10__256309540	256309540	13.8336	0.0155	-0.0441	0.0005	4.4066	1.46874e-14	SIG
F_PHI	Chr11__128714775	128714775	9.0775	0.0189		0.0002	1.4459	1.00996e-10	SIG
F_PHI	Chr11__223566303	223566303	12.5416	-0.0228		0.0002	1.649	2.97041e-14	SIG
F_PHI	Chr12__129903214	129903214	5.3467	-0.0135		0.0001	0.917	6.97604e-07	SUG
F_PHI	Chr15__2823881	2823881	14.7638	-0.005	0.0738	0.0006	5.1257	1.72497e-15	SIG
F_PHI	Chr15__57652569	57652569	13.6673	0.0225		0.0002	1.7086	2.13314e-15	SIG
F_PHI	Chr16__134770766	134770766	8.5028	0.0003	0.0293	0.0002	1.671	3.14402e-09	SIG
F_PHI	Chr16__288091174	288091174	5.736	-0.0197	0.0061	0.0002	1.5832	1.83736e-06	SUG
F_PHI	Chr19__138115623	138115623	7.8686	-0.0405	0.0058	0.0003	2.1789	1.35434e-08	SIG
F_PHI	Chr21__56308364	56308364	6.7924	0.0347	0.0006	0.0002	2.0529	1.61379e-07	SUG
F_PHI	Chr22__182781037	182781037	13.4387	-0.0263	0.0051	0.0002	1.3505	3.64574e-14	SIG
F_PHI	Chr23__20069289	20069289	17.8311	0.0516	-0.0239	0.0003	2.2968	1.47765e-18	SIG
F_PHI	Chr23__247223205	247223205	11.0083	-0.0199		0.0003	2.6476	1.07984e-12	SIG
F_PHI	Chr23__311648943	311648943	7.4807	0.0174		0.0003	2.3876	4.3764e-09	SIG
F_PHI	Chr24__242337994	242337994	15.6042	-0.0249		0.0006	4.7263	2.31348e-17	SIG
F_PHI	Chr25__56335861	56335861	10.7665	-0.0197		0.0002	1.6024	1.90469e-12	SIG
F_PHI	Chr25__76425804	76425804	27.4047	-0.132	-0.0196	0.0007	5.5138	3.94712e-28	SIG
F_PHI	Chr26__51218286	51218286	9.2452	0.02		0.0002	1.5007	6.80514e-11	SIG
F_PHI	Chr26__183163437	183163437	22.2529	0.0305		0.0004	3.5742	4.3689e-24	SIG
F_SFWI	Chr2__68509602	68509602	29.2728	-0.0285	0.0533	0.0014	6.2877	5.34889e-30	SIG
F_SFWI	Chr2__222987025	222987025	19.2721	-0.0268		0.0003	1.5368	4.48419e-21	SIG
F_SFWI	Chr3__168194674	168194674	19.81	-0.027		0.0004	2.049	1.28223e-21	SIG
F_SFWI	Chr4__273561411	273561411	17.3734	0.0051	-0.039	0.0005	2.1078	4.23885e-18	SIG
F_SFWI	Chr6__25813745	25813745	17.4902	-0.0129	0.0452	0.0007	3.1909	3.23925e-18	SIG
F_SFWI	Chr8__259280190	259280190	27.724	0.034		0.0011	4.9851	1.32624e-29	SIG
F_SFWI	Chr9__220609008	220609008	13.7271	-0.0223		0.0003	1.4078	1.8548e-15	SIG
F_SFWI	Chr11__108081761	108081761	9.2596	0.0179		0.0003	1.4612	6.5791e-11	SIG
F_SFWI	Chr12__159905739	159905739	13.9529	0.0313	-0.0192	0.0003	1.5758	1.11585e-14	SIG
F_SFWI	Chr12__228965688	228965688	6.3942	-0.0203	0.01	0.0002	0.9532	4.03716e-07	SUG
F_SFWI	Chr13__184317730	184317730	21.2399	-0.0289		0.0004	1.8325	4.60601e-23	SIG
F_SFWI	Chr15__206450605	206450605	14.3589	-0.0346	0.0076	0.0005	2.2308	4.38111e-15	SIG
F_SFWI	Chr17__236557590	236557590	19.1333	-0.033	0.0093	0.0004	1.825	7.36956e-20	SIG
F_SFWI	Chr18__57980427	57980427	8.7883	-0.0173		0.0002	0.9677	1.99641e-10	SIG
F_SFWI	Chr21__30193437	30193437	7.8812	-0.0025	0.0512	0.0003	1.2779	1.3154e-08	SIG
F_SFWI	Chr21__43771461	43771461	11.0911	0.0069	-0.0291	0.0003	1.274	8.1163e-12	SIG
F_SFWI	Chr23__192930082	192930082	6.6333	-0.0061	0.0317	0.0002	0.9901	2.32783e-07	SUG
F_SFWI	Chr23__241312038	241312038	12.5082	-0.0207		0.0002	1.1058	3.21171e-14	SIG
F_SFWI	Chr24__197831646	197831646	13.8059	-0.0011	0.0488	0.0004	2.0616	1.5654e-14	SIG
F_SFWI	Chr25__183214918	183214918	21.0538	-0.0035	-0.0576	0.0005	2.4852	8.85014e-22	SIG
F_SFWI	Chr25__199889667	199889667	11.5141	-0.0214		0.0004	1.6444	3.29766e-13	SIG
F_SFWI	Chr26__205224413	205224413	9.4457	-0.0021	0.0537	0.0003	1.4923	3.58623e-10	SIG
F_SFWI	Chr27__93847429	93847429	8.16	-0.0212	-0.0095	0.0002	1.1121	6.92235e-09	SIG
F_SFWI	Chr27__98599394	98599394	3.537	0.0105		0.0001	0.4662	5.44072e-05	SUG
F_SFWI	Chr27__113277491	113277491	17.0973	-0.0251		0.0003	1.331	7.10876e-19	SIG
F_SFWI	Chr27__161373885	161373885	6.5988	0.0156		0.0002	1.1058	3.5382e-08	SIG
F_SDWI	Chr1__193993897	193993897	9.4513	-0.0221		0.0003	1.3929	4.1897e-11	SIG
F_SDWI	Chr1__239599792	239599792	6.7315	0.0181		0.0003	1.4596	2.5823e-08	SIG
F_SDWI	Chr1__277039485	277039485	18.0584	0.0322		0.0004	1.8219	7.57116e-20	SIG
F_SDWI	Chr2__153708073	153708073	16.1854	0.0311		0.001	4.312	5.9611e-18	SIG
F_SDWI	Chr4__38158256	38158256	19.266	-0.0048	0.0627	0.0009	4.0957	5.42928e-20	SIG
F_SDWI	Chr5__196081888	196081888	14.4859	-0.0284		0.0007	3.1083	3.14923e-16	SIG
F_SDWI	Chr6__181455981	181455981	19.7227	0.0123	0.1082	0.0008	3.6459	1.89668e-20	SIG
F_SDWI	Chr10__241406899	241406899	30.9761	0.0233	0.0849	0.0008	3.4349	1.05944e-31	SIG
F_SDWI	Chr11__49314453	49314453	19.3343	-0.0346		0.0008	3.4044	3.88034e-21	SIG
F_SDWI	Chr11__184516226	184516226	20.3766	-0.0466	0.008	0.0008	3.5998	4.2084e-21	SIG
F_SDWI	Chr12__177914032	177914032	9.8317	0.0239		0.0004	1.5993	1.71223e-11	SIG
F_SDWI	Chr16__238974563	238974563	7.0563	0.0193		0.0002	1.0566	1.19556e-08	SIG
F_SDWI	Chr17__281632272	281632272	16.4764	-0.0085	0.0422	0.0005	2.4373	3.34351e-17	SIG
F_SDWI	Chr19__252539145	252539145	13.8258	-0.0273		0.0003	1.4726	1.47268e-15	SIG
F_SDWI	Chr20__82782426	82782426	8.8377	-0.0354	-0.0074	0.0002	1.0488	1.45422e-09	SIG
F_SDWI	Chr22__20872566	20872566	9.725	0.0092	-0.0354	0.0005	2.1231	1.88507e-10	SIG
F_SDWI	Chr22__153655098	153655098	9.037	0.0211	-0.0218	0.0004	1.82	9.19085e-10	SIG
F_SDWI	Chr22__323257436	323257436	17.0813	-0.0067	-0.0444	0.0005	2.0881	8.30496e-18	SIG
F_SDWI	Chr23__107689415	107689415	14.31	0.0133	0.0469	0.0003	1.5258	4.90332e-15	SIG
F_SDWI	Chr23__263331456	263331456	5.6403	-0.0175		0.0002	0.8202	3.46081e-07	SUG
F_SDWI	Chr24__85934465	85934465	9.9403	0.0414	-0.0067	0.0005	2.3455	1.14822e-10	SIG
F_SDWI	Chr25__38584898	38584898	4.5335	0.0273	-0.0069	0.0002	1.0244	2.92868e-05	SUG
F_SDWI	Chr27__68466932	68466932	20.2945	0.0097	0.0484	0.0004	1.6959	5.08421e-21	SIG
F_SDWI	Chr27__117278694	117278694	35.1712	0.0588	0.0046	0.0007	3.0453	6.76193e-36	SIG
A_MFVD	Chr1__214103597	214103597	35.4296	0.055		0.0014	4.6489	2.31607e-37	SIG
A_MFVD	Chr2__273150273	273150273	22.1152	0.0298	0.0746	0.0003	1.0848	7.68425e-23	SIG
A_MFVD	Chr3__585698	585698	20.5599	0.0153	0.0976	0.0008	2.8092	2.75967e-21	SIG
A_MFVD	Chr5__190193813	190193813	19.7758	-0.0373		0.0005	1.6706	1.38848e-21	SIG
A_MFVD	Chr7__34470688	34470688	22.5301	0.053	-0.0074	0.0011	3.7863	2.95587e-23	SIG
A_MFVD	Chr8__1683860	1683860	27.8703	0.029	0.0928	0.0006	2.0708	1.35109e-28	SIG
A_MFVD	Chr8__136219302	136219302	28.1176	0.0773	0.0393	0.0002	0.7914	7.64619e-29	SIG
A_MFVD	Chr13__5002636	5002636	22.8885	-0.0398		0.0006	2.1869	9.97211e-25	SIG
A_MFVD	Chr14__192718503	192718503	15.204	0.0591	-0.0047	0.001	3.4753	6.26029e-16	SIG
A_MFVD	Chr15__216309708	216309708	13.4285	-0.0288		0.0004	1.3511	3.72845e-15	SIG
A_MFVD	Chr16__63092510	63092510	29.6375	-0.0522	-0.033	0.0001	0.3821	2.3101e-30	SIG
A_MFVD	Chr16__106102498	106102498	17.1392	0.0339		0.0005	1.6459	6.44863e-19	SIG
A_MFVD	Chr18__279210322	279210322	24.0034	0.066	0.0004	0.0018	6.2209	9.94233e-25	SIG
A_MFVD	Chr18__300164469	300164469	7.6253	-0.0103	0.0287	0.0004	1.2397	2.37125e-08	SIG
A_MFVD	Chr19__106603046	106603046	6.7847	0.0128	-0.0318	0.0004	1.3427	1.64268e-07	SUG
A_MFVD	Chr19__138115623	138115623	8.0121	-0.0525	-0.0088	0.0004	1.3743	9.73235e-09	SIG
A_MFVD	Chr19__144159670	144159670	26.1278	-0.0344	-0.0628	0.0002	0.6711	7.46653e-27	SIG
A_MFVD	Chr22__160410575	160410575	12.6728	-0.0065	-0.0704	0.0005	1.8245	2.12646e-13	SIG
A_MFVD	Chr22__201784939	201784939	18.6184	-0.0021	-0.0907	0.001	3.4167	2.41147e-19	SIG
A_MFVD	Chr23__234804567	234804567	15.1025	-0.0316		0.0004	1.4417	7.46096e-17	SIG
A_MFVD	Chr24__297115250	297115250	19.0703	0.0354		0.0005	1.6571	7.17337e-21	SIG
A_MFVD	Chr24__328883509	328883509	13.2279	0.0288		0.0004	1.3229	5.96115e-15	SIG
A_MFVD	Chr25__22908182	22908182	6.9569	0.0284	0.0011	0.0002	0.8391	1.10505e-07	SIG
A_MFVD	Chr26__182015460	182015460	18.9007	-0.0355		0.0005	1.7636	1.06479e-20	SIG
A_WI	Chr1__98055371	98055371	36.1911	-0.4739	-0.1235	0.0287	2.0049	6.45935e-37	SIG
A_WI	Chr3__151378875	151378875	9.9781	-0.1934		0.0287	2.005	1.21353e-11	SIG
A_WI	Chr3__279863926	279863926	15.6009	-0.233		0.0413	2.8898	2.33098e-17	SIG
A_WI	Chr4__24987793	24987793	22.611	-0.4173	-0.1106	0.0384	2.6854	2.45389e-23	SIG
A_WI	Chr7__34470688	34470688	16.8303	-0.327	0.0192	0.0386	2.6999	1.48017e-17	SIG
A_WI	Chr9__95363777	95363777	8.6588	0.0367	0.2707	0.014	0.9762	2.19549e-09	SIG
A_WI	Chr9__96384687	96384687	10.9416	-0.2032		0.033	2.307	1.26292e-12	SIG
A_WI	Chr10__302208185	302208185	12.2537	0.0977	0.4235	0.0198	1.3819	5.5815e-13	SIG
A_WI	Chr12__151022426	151022426	19.5015	-0.2712		0.0285	1.9924	2.62913e-21	SIG
A_WI	Chr15__224740673	224740673	24.5502	0.3264		0.0377	2.64	2.10025e-26	SIG
A_WI	Chr16__63092510	63092510	29.1161	0.3955	0.0462	0.0205	1.4319	7.67248e-30	SIG
A_WI	Chr16__240693125	240693125	7.9062	0.2573	0.0207	0.0247	1.7287	1.2419e-08	SIG
A_WI	Chr20__226689134	226689134	19.2791	-0.1046	0.3416	0.0359	2.5096	5.2676e-20	SIG
A_WI	Chr21__172499992	172499992	10.0202	0.1857		0.0168	1.1758	1.09932e-11	SIG
A_WI	Chr23__234422123	234422123	4.4768	-0.1151		0.0092	0.6442	5.61327e-06	SUG
A_WI	Chr23__289515135	289515135	16.5901	-0.2962	0.0023	0.022	1.5401	2.57314e-17	SIG
A_WI	Chr24__115918888	115918888	26.7616	-0.335		0.0623	4.362	1.23741e-28	SIG
A_WI	Chr24__260940601	260940601	9.9812	-0.1535	0.2948	0.0245	1.7112	1.04508e-10	SIG
A_WI	Chr24__324438637	324438637	3.5047	0.0027	0.2313	0.0086	0.6007	0.000312887	SUG
A_WI	Chr25__211042485	211042485	10.5614	-0.3336	0.0559	0.0342	2.3911	2.74768e-11	SIG
A_WI	Chr26__151660395	151660395	11.2033	-0.1606	0.3414	0.0406	2.8422	6.26728e-12	SIG
A_WI	Chr26__188384371	188384371	13.4175	0.0003	-0.2608	0.0117	0.8194	3.82845e-14	SIG
A_WI	Chr27__191718985	191718985	15.6281	-0.2428		0.0302	2.1114	2.18805e-17	SIG
A_PH_T	Chr3__121667101	121667101	17.4208	0.7538	-0.1772	0.196	2.1497	3.80087e-18	SIG
A_PH_T	Chr5__164270073	164270073	7.4723	0.3742		0.1241	1.3619	4.46435e-09	SIG
A_PH_T	Chr9__165594367	165594367	9.6503	-0.4302		0.1847	2.0262	2.62309e-11	SIG
A_PH_T	Chr9__208102347	208102347	11.376	-0.4711		0.115	1.2621	4.558e-13	SIG
A_PH_T	Chr10__47765918	47765918	20.9681	0.1848	0.8018	0.1306	1.4322	1.07802e-21	SIG
A_PH_T	Chr10__100741454	100741454	12.1346	0.4958		0.1773	1.9447	7.70443e-14	SIG
A_PH_T	Chr10__248733612	248733612	11.939	-0.2242	0.7673	0.214	2.3471	1.15185e-12	SIG
A_PH_T	Chr10__254370512	254370512	9.4903	0.1774	-0.6944	0.1672	1.8344	3.23606e-10	SIG
A_PH_T	Chr13__11421997	11421997	13.551	0.5289		0.1305	1.4319	2.80004e-15	SIG
A_PH_T	Chr13__228464105	228464105	11.9162	-0.4906		0.2076	2.2776	1.28515e-13	SIG
A_PH_T	Chr13__242555416	242555416	29.6235	0.1034	-1.0841	0.2655	2.9126	2.3857e-30	SIG
A_PH_T	Chr14__6165751	6165751	13.7942	0.5551		0.1139	1.2497	1.58564e-15	SIG
A_PH_T	Chr14__241494663	241494663	8.4726	-0.4518	-0.0676	0.0855	0.9381	3.37026e-09	SIG
A_PH_T	Chr16__85535156	85535156	33.0204	-0.947		0.4205	4.6125	6.15096e-35	SIG
A_PH_T	Chr16__165273239	165273239	24.4039	-0.0466	1.0618	0.2957	3.2433	3.95346e-25	SIG
A_PH_T	Chr18__18386679	18386679	6.1196	0.4734	-0.0075	0.1237	1.357	7.59742e-07	SUG
A_PH_T	Chr19__48470759	48470759	30.7604	-1.2361	-0.1362	0.5448	5.9766	1.74062e-31	SIG
A_PH_T	Chr19__51243690	51243690	15.8646	0.5965		0.2236	2.453	1.26002e-17	SIG
A_PH_T	Chr20__208813987	208813987	8.8825	-0.1373	0.8093	0.1636	1.795	1.31161e-09	SIG
A_PH_T	Chr22__42619657	42619657	25.5133	0.1313	-0.9515	0.1934	2.1215	3.07345e-26	SIG
A_PH_T	Chr22__321026711	321026711	4.023	-0.6222	0.0856	0.0746	0.8182	9.48738e-05	SUG
A_PH_T	Chr24__51931189	51931189	12.9596	0.565		0.2394	2.6265	1.11651e-14	SIG
A_PH_T	Chr26__97059227	97059227	18.2876	-0.7611	-0.0907	0.1576	1.7285	5.16552e-19	SIG
A_SFW_T	Chr2__159676764	159676764	27.3022	-0.0381	-0.2318	0.0102	2.8413	4.99813e-28	SIG
A_SFW_T	Chr3__60591650	60591650	12.7756	-0.1279	0.0615	0.0105	2.9143	1.67832e-13	SIG
A_SFW_T	Chr4__258242409	258242409	18.3755	-0.0333	-0.2771	0.0096	2.6539	4.21831e-19	SIG
A_SFW_T	Chr5__181150100	181150100	13.7308	0.0281	0.1704	0.0052	1.4312	1.861e-14	SIG
A_SFW_T	Chr7__170819577	170819577	17.0311	0.1272		0.0088	2.4411	8.29621e-19	SIG
A_SFW_T	Chr7__193594934	193594934	20.6224	-0.0522	-0.2222	0.0098	2.7103	2.39e-21	SIG
A_SFW_T	Chr9__92364709	92364709	18.1243	0.1239		0.0127	3.5152	6.49429e-20	SIG
A_SFW_T	Chr12__64162355	64162355	15.4461	-0.1606	-0.006	0.011	3.0534	3.58459e-16	SIG
A_SFW_T	Chr14__238399658	238399658	4.7482	-0.0098	0.0958	0.0026	0.7107	1.78648e-05	SUG
A_SFW_T	Chr15__224740707	224740707	18.7001	-0.1339		0.0064	1.7709	1.69842e-20	SIG
A_SFW_T	Chr18__38834968	38834968	17.0303	-0.0282	-0.156	0.0049	1.3465	9.34036e-18	SIG
A_SFW_T	Chr18__335642526	335642526	17.2681	-0.1422	0.0937	0.0113	3.1379	5.40203e-18	SIG
A_SFW_T	Chr19__144765304	144765304	32.0796	0.2114	-0.0215	0.0104	2.8723	8.34801e-33	SIG
A_SFW_T	Chr19__168631125	168631125	7.1568	-0.0135	0.1143	0.0038	1.0558	6.97389e-08	SIG
A_SFW_T	Chr20__36071685	36071685	18.6158	-0.1526	0.0077	0.0054	1.5085	2.426e-19	SIG
A_SFW_T	Chr20__179946439	179946439	20.8413	0.1357		0.0088	2.4325	1.16404e-22	SIG
A_SFW_T	Chr22__21479395	21479395	11.2436	0.094		0.0075	2.0858	6.21774e-13	SIG
A_SFW_T	Chr22__160410660	160410660	26.0802	-0.0987	-0.3071	0.0073	2.0245	8.33195e-27	SIG
A_SFW_T	Chr23__267334437	267334437	6.9622	-0.0715		0.0045	1.2356	1.49406e-08	SIG
A_SFW_T	Chr24__53262015	53262015	10.286	0.0125	-0.1365	0.0053	1.4681	5.18012e-11	SIG
A_SFW_T	Chr24__108107420	108107420	15.955	-0.0122	0.1478	0.0056	1.5569	1.11073e-16	SIG
A_SFW_T	Chr24__115918888	115918888	16.1261	0.1179		0.0077	2.1428	6.84608e-18	SIG
A_SFW_T	Chr25__61398623	61398623	15.4455	0.1173		0.006	1.6773	3.35046e-17	SIG
A_SDW_T	Chr1__30926638	30926638	13.9534	-0.0369	-0.0038	0.0004	2.5978	1.1147e-14	SIG
A_SDW_T	Chr1__138296154	138296154	11.0144	-0.0037	0.0299	0.0003	1.7946	9.68316e-12	SIG
A_SDW_T	Chr2__141750367	141750367	16.8203	0.0063	0.0404	0.0003	1.9759	1.51477e-17	SIG
A_SDW_T	Chr2__169370942	169370942	18.712	0.0257		0.0003	2.1158	1.65204e-20	SIG
A_SDW_T	Chr2__269520847	269520847	6.9313	-0.0136		0.0002	1.1004	1.6078e-08	SIG
A_SDW_T	Chr4__18441123	18441123	10.9963	0.0013	-0.0414	0.0003	2.0668	1.0094e-11	SIG
A_SDW_T	Chr4__264929749	264929749	27.9262	0.0121	0.0426	0.0002	1.6544	1.18816e-28	SIG
A_SDW_T	Chr5__161303886	161303886	20.0889	0.0051	0.0352	0.0002	1.5762	8.16242e-21	SIG
A_SDW_T	Chr7__217703244	217703244	18.7613	0.0254		0.0003	2.3172	1.47303e-20	SIG
A_SDW_T	Chr8__65785064	65785064	14.1051	-0.0404	-0.006	0.0004	2.4356	7.86007e-15	SIG
A_SDW_T	Chr11__129693518	129693518	13.1604	-0.0192		0.0002	1.3254	6.9801e-15	SIG
A_SDW_T	Chr11__130536554	130536554	10.2891	-0.0176		0.0002	1.3491	5.84359e-12	SIG
A_SDW_T	Chr11__269965111	269965111	9.9863	-0.0178		0.0003	2.1482	1.19057e-11	SIG
A_SDW_T	Chr16__112582953	112582953	8.3204	-0.0048	0.0493	0.0002	1.5681	4.78491e-09	SIG
A_SDW_T	Chr16__125764264	125764264	7.741	0.005	-0.018	0.0001	0.8156	1.8165e-08	SIG
A_SDW_T	Chr16__173754387	173754387	18.9998	-0.0079	-0.0323	0.0002	1.2781	1.00207e-19	SIG
A_SDW_T	Chr17__34549067	34549067	10.253	-0.0173		0.0002	1.1803	6.36041e-12	SIG
A_SDW_T	Chr18__19367077	19367077	14.5785	0.005	0.0654	0.0003	2.2985	2.64246e-15	SIG
A_SDW_T	Chr21__207560209	207560209	15.7189	-0.0216		0.0003	1.943	1.77e-17	SIG
A_SDW_T	Chr23__90989896	90989896	26.7739	-0.0319		0.0006	4.437	1.20268e-28	SIG
A_SDW_T	Chr23__225163809	225163809	7.9537	0.0014	0.0225	0.0001	0.8718	1.11327e-08	SIG
A_SDW_T	Chr23__308312917	308312917	12.0979	-0.0186		0.0003	1.8002	8.39451e-14	SIG
A_SDW_T	Chr25__2192949	2192949	23.0589	0.0366	-0.0022	0.0004	3.0827	8.74817e-24	SIG
A_SDW_T	Chr25__13998487	13998487	8.3945	-0.0266	0.0031	0.0002	1.458	4.03483e-09	SIG
A_SDW_T	Chr26__151608041	151608041	24.2696	0.0356	0.013	0.0001	0.9829	5.38657e-25	SIG
A_SDW_T	Chr27__130411836	130411836	7.7161	0.004	0.0406	0.0002	1.0402	1.9238e-08	SIG
A_PH_CK	Chr2__209702237	209702237	10.2332	-0.4348		0.1879	1.487	6.66326e-12	SIG
A_PH_CK	Chr4__181106609	181106609	20.0451	-0.4817	0.9502	0.4389	3.4733	9.02908e-21	SIG
A_PH_CK	Chr5__279767023	279767023	15.0479	0.5638		0.1883	1.4899	8.47589e-17	SIG
A_PH_CK	Chr8__41612194	41612194	15.0574	0.6395	-0.2443	0.155	1.2267	8.7735e-16	SIG
A_PH_CK	Chr8__254412494	254412494	15.4724	0.5584		0.2417	1.9125	3.14674e-17	SIG
A_PH_CK	Chr9__103556733	103556733	15.1174	-0.4026	0.9375	0.2813	2.2259	7.64087e-16	SIG
A_PH_CK	Chr9__109461294	109461294	10.5466	0.4622		0.0998	0.7897	3.19145e-12	SIG
A_PH_CK	Chr10__293913026	293913026	8.1234	0.4724	-0.2651	0.136	1.076	7.5323e-09	SIG
A_PH_CK	Chr12__47194161	47194161	36.0497	0.7436	2.1199	0.2557	2.0238	8.94623e-37	SIG
A_PH_CK	Chr12__203004016	203004016	26.2001	0.3457	2.2317	0.3522	2.7873	6.32152e-27	SIG
A_PH_CK	Chr12__244118387	244118387	20.2604	0.6889	-0.5197	0.1421	1.1244	5.49938e-21	SIG
A_PH_CK	Chr13__80931203	80931203	14.9599	-0.5366		0.1669	1.3206	1.04096e-16	SIG
A_PH_CK	Chr13__283055798	283055798	9.3663	-0.695	0.0128	0.1671	1.3224	4.30543e-10	SIG
A_PH_CK	Chr14__60967743	60967743	26.3776	-0.7997		0.3117	2.4669	3.01732e-28	SIG
A_PH_CK	Chr16__125764264	125764264	20.2506	-0.1072	-0.8354	0.139	1.1004	5.62569e-21	SIG
A_PH_CK	Chr16__214729339	214729339	39.9628	1.1546	0.7935	0.078	0.617	1.09315e-40	SIG
A_PH_CK	Chr17__1272881	1272881	15.1127	0.5505		0.2413	1.9098	7.28656e-17	SIG
A_PH_CK	Chr17__19687897	19687897	12.8807	0.4937		0.1166	0.9228	1.34305e-14	SIG
A_PH_CK	Chr17__339244693	339244693	24.7223	-0.2132	-1.1359	0.2495	1.9748	1.89928e-25	SIG
A_PH_CK	Chr22__42619657	42619657	18.3258	0.3642	-0.7142	0.1576	1.2471	4.72999e-19	SIG
A_PH_CK	Chr22__145815947	145815947	13.0489	-0.4961		0.1754	1.3884	9.0614e-15	SIG
A_PH_CK	Chr25__44306212	44306212	21.8516	0.7294		0.5321	4.2109	1.11055e-23	SIG
A_PH_CK	Chr25__61781644	61781644	10.4474	-0.5157	0.382	0.2003	1.5849	3.57269e-11	SIG
A_PH_CK	Chr25__153920740	153920740	17.421	1.0494	0.0568	0.4028	3.1877	3.79897e-18	SIG
A_PH_CK	Chr26__181220166	181220166	31.5127	-0.0948	1.0788	0.2387	1.8889	3.07927e-32	SIG
A_PH_CK	Chr26__213079381	213079381	12.2775	-0.4814		0.1361	1.0771	5.51219e-14	SIG
A_SFW_CK	Chr1__238881071	238881071	21.4735	-0.1632		0.0126	3.2539	2.67551e-23	SIG
A_SFW_CK	Chr2__141255649	141255649	13.6114	0.2209	0.0161	0.0167	4.3007	2.44989e-14	SIG
A_SFW_CK	Chr4__248892780	248892780	23.3299	0.1742		0.0175	4.5015	3.57551e-25	SIG
A_SFW_CK	Chr4__255463251	255463251	34.2391	-0.14	-0.2977	0.0068	1.763	5.78311e-35	SIG
A_SFW_CK	Chr5__161303886	161303886	10.9756	-0.0459	0.149	0.0094	2.4293	1.05867e-11	SIG
A_SFW_CK	Chr5__210670725	210670725	13.5239	-0.1831	-0.0579	0.0088	2.2723	2.99642e-14	SIG
A_SFW_CK	Chr9__50814786	50814786	18.7051	-0.2113	-0.1125	0.0059	1.511	1.97524e-19	SIG
A_SFW_CK	Chr9__84982247	84982247	4.2931	0.104	0.0466	0.0036	0.9153	5.09361e-05	SUG
A_SFW_CK	Chr9__110581460	110581460	11.0316	0.0626	-0.1727	0.013	3.349	9.30702e-12	SIG
A_SFW_CK	Chr10__47765918	47765918	25.8801	0.0274	0.2188	0.0094	2.4161	1.3209e-26	SIG
A_SFW_CK	Chr10__107418819	107418819	7.1431	0.0785	-0.139	0.0072	1.8552	7.19642e-08	SIG
A_SFW_CK	Chr14__32900697	32900697	9.2148	0.1361	-0.0074	0.006	1.5392	6.1024e-10	SIG
A_SFW_CK	Chr17__40996284	40996284	17.0385	0.0096	0.2037	0.0094	2.4299	9.16437e-18	SIG
A_SFW_CK	Chr18__316871000	316871000	13.5275	-0.1317		0.0112	2.8891	2.95836e-15	SIG
A_SFW_CK	Chr22__201270554	201270554	23.5802	0.2316	-0.0344	0.02	5.1526	2.63415e-24	SIG
A_SFW_CK	Chr25__38460769	38460769	17.7507	-0.265	-0.0584	0.0098	2.5289	1.77801e-18	SIG
A_SFW_CK	Chr25__140996686	140996686	33.4085	-0.1562	-0.4056	0.0125	3.2338	3.91505e-34	SIG
A_SFW_CK	Chr25__217724645	217724645	23.2938	-0.193	-0.1661	0.0162	4.166	5.09374e-24	SIG
A_SFW_CK	Chr27__148805349	148805349	18.3179	-0.1517		0.0183	4.7139	4.13704e-20	SIG
A_SDW_CK	Chr1__18601069	18601069	13.1855	-0.0283		0.0005	2.0096	6.58273e-15	SIG
A_SDW_CK	Chr1__285804634	285804634	8.1596	-0.0132	0.0434	0.0005	2.0289	6.92903e-09	SIG
A_SDW_CK	Chr2__83882336	83882336	20.8606	-0.0052	0.0512	0.0007	2.8291	1.381e-21	SIG
A_SDW_CK	Chr2__237028334	237028334	16.3587	0.0374	0.013	0.0004	1.4769	4.38421e-17	SIG
A_SDW_CK	Chr3__145949711	145949711	5.916	0.0049	-0.0347	0.0003	1.2354	1.2141e-06	SUG
A_SDW_CK	Chr4__200115016	200115016	9.3818	0.0056	0.0581	0.0004	1.5431	4.15471e-10	SIG
A_SDW_CK	Chr5__173318240	173318240	13.6593	-0.0007	0.0595	0.0007	2.8329	2.19397e-14	SIG
A_SDW_CK	Chr10__46239045	46239045	18.3285	0.042	-0.0111	0.0007	2.6663	4.70122e-19	SIG
A_SDW_CK	Chr11__106887440	106887440	6.9148	-0.02		0.0003	1.0593	1.67164e-08	SIG
A_SDW_CK	Chr14__60967743	60967743	5.1469	-0.0174		0.0001	0.5714	1.12493e-06	SUG
A_SDW_CK	Chr16__42892671	42892671	10.575	-0.0256		0.0005	1.8465	2.98575e-12	SIG
A_SDW_CK	Chr16__125764264	125764264	38.2828	-0.004	-0.0742	0.0012	4.7638	5.23107e-39	SIG
A_SDW_CK	Chr17__55945682	55945682	11.0057	-0.0257		0.0005	1.8375	1.08647e-12	SIG
A_SDW_CK	Chr17__276287150	276287150	9.4261	-0.0239		0.0005	2.0139	4.44576e-11	SIG
A_SDW_CK	Chr18__227153111	227153111	13.1544	-0.0296		0.0003	1.259	7.0795e-15	SIG
A_SDW_CK	Chr18__261238086	261238086	14.304	0.0301		0.0003	1.359	4.81738e-16	SIG
A_SDW_CK	Chr18__285760836	285760836	23.8227	0.0441		0.0007	2.6189	1.13801e-25	SIG
A_SDW_CK	Chr20__160752849	160752849	16.8788	-0.0719	-0.0106	0.0008	3.1678	1.32387e-17	SIG
A_SDW_CK	Chr21__12917889	12917889	6.0509	-0.0192		0.0003	1.3519	1.3013e-07	SIG
A_SDW_CK	Chr22__215064455	215064455	25.1535	0.0432		0.0008	3.1802	5.17309e-27	SIG
A_SDW_CK	Chr22__217026448	217026448	39.2624	-0.0646		0.0016	6.2055	3.23635e-41	SIG
A_SDW_CK	Chr25__151677932	151677932	45.2067	-0.0492	-0.0927	0.0005	1.8372	6.23649e-46	SIG
A_SDW_CK	Chr25__212067914	212067914	11.3944	0.0269		0.0004	1.4663	4.36565e-13	SIG
A_SDW_CK	Chr27__148805349	148805349	10.7495	-0.0258		0.0005	2.0585	1.98237e-12	SIG
A_PHI	Chr1__222393735	222393735	15.6953	0.0263		0.0003	2.9619	1.87015e-17	SIG
A_PHI	Chr5__183821634	183821634	13.9672	-0.0272		0.0005	4.3265	1.05822e-15	SIG
A_PHI	Chr5__247802950	247802950	10.7982	-0.0222		0.0002	1.8948	1.76831e-12	SIG
A_PHI	Chr9__165027935	165027935	11.3908	-0.022		0.0001	1.3376	4.40287e-13	SIG
A_PHI	Chr10__95516917	95516917	8.7659	0.0205		0.0003	3.0174	2.10463e-10	SIG
A_PHI	Chr12__42405633	42405633	6.0629	-0.0078	0.0284	0.0003	2.3075	8.65697e-07	SUG
A_PHI	Chr12__121549893	121549893	9.9574	-0.0073	0.0284	0.0003	2.8388	1.10399e-10	SIG
A_PHI	Chr16__250036684	250036684	5.6017	-0.0244	-0.0043	0.0002	1.8523	2.50353e-06	SUG
A_PHI	Chr16__279905154	279905154	10.5419	0.023		0.0003	2.5041	3.22694e-12	SIG
A_PHI	Chr17__30345461	30345461	15.3315	0.0261		0.0004	3.3201	4.37203e-17	SIG
A_PHI	Chr18__10269945	10269945	12.8892	0.0238		0.0002	2.0601	1.31663e-14	SIG
A_PHI	Chr20__24219926	24219926	10.2325	-0.0206		0.0003	2.827	6.6742e-12	SIG
A_PHI	Chr20__155805329	155805329	18.2255	-0.0118	-0.081	0.0005	4.7533	5.95876e-19	SIG
A_PHI	Chr22__47192273	47192273	11.4464	-0.0243		0.0003	2.9192	3.865e-13	SIG
A_PHI	Chr22__263705252	263705252	15.4199	-0.0028	-0.0509	0.0005	4.3064	3.80812e-16	SIG
A_PHI	Chr24__180022818	180022818	15.6136	-0.0355	-0.011	0.0002	1.5262	2.43774e-16	SIG
A_PHI	Chr24__189631207	189631207	12.0161	-0.0237		0.0003	2.7827	1.01691e-13	SIG
A_PHI	Chr24__202530757	202530757	9.2016	-0.0216		0.0003	2.3828	7.54154e-11	SIG
A_PHI	Chr27__4548438	4548438	22.0323	-0.0156	-0.0426	0.0002	2.0814	9.30112e-23	SIG
A_PHI	Chr27__118428038	118428038	14.4807	-0.0273		0.0004	3.2891	3.18788e-16	SIG
A_PHI	Chr27__201425055	201425055	9.1681	-0.0205		0.0003	2.5498	8.16056e-11	SIG
A_SFWI	Chr1__98055371	98055371	42.0841	0.1091	-0.0031	0.0027	5.8054	8.26989e-43	SIG
A_SFWI	Chr2__273150273	273150273	4.9266	0.0042	0.0628	0.0005	0.9958	1.18469e-05	SUG
A_SFWI	Chr3__125998680	125998680	8.6894	0.0353		0.0006	1.3495	2.52066e-10	SIG
A_SFWI	Chr9__2792029	2792029	8.3799	0.0334		0.0007	1.4351	5.2305e-10	SIG
A_SFWI	Chr10__144472722	144472722	45.7958	-0.1293	-0.0439	0.0029	6.1401	1.6067e-46	SIG
A_SFWI	Chr12__82559922	82559922	6.7937	-0.0413	0.0025	0.0009	1.8733	1.60891e-07	SUG
A_SFWI	Chr13__33754453	33754453	10.1031	-0.0392		0.0008	1.7701	9.04756e-12	SIG
A_SFWI	Chr16__63092510	63092510	12.562	-0.0457	0.0238	0.0007	1.56	2.74421e-13	SIG
A_SFWI	Chr16__106102498	106102498	12.4864	0.0419		0.0007	1.5963	3.37963e-14	SIG
A_SFWI	Chr18__327209663	327209663	9.6501	0.0121	0.0743	0.0007	1.5368	2.24017e-10	SIG
A_SFWI	Chr19__18497588	18497588	5.0883	0.0276		0.0007	1.463	1.29437e-06	SUG
A_SFWI	Chr19__254304848	254304848	10.4967	0.0418		0.0009	2.0226	3.5885e-12	SIG
A_SFWI	Chr20__228659236	228659236	9.7201	-0.0378		0.0008	1.7723	2.22626e-11	SIG
A_SFWI	Chr22__268155309	268155309	11.9136	-0.0404		0.0014	3.0569	1.29291e-13	SIG
A_SFWI	Chr23__184148745	184148745	10.0078	-0.0547	-0.0067	0.001	2.2216	9.83101e-11	SIG
A_SFWI	Chr23__300413718	300413718	6.9679	0.0328		0.001	2.1635	1.4739e-08	SIG
A_SFWI	Chr24__46615117	46615117	22.4723	-0.0591		0.0019	4.1625	2.62409e-24	SIG
A_SFWI	Chr24__115918888	115918888	7.5465	0.0316		0.0006	1.1953	3.7459e-09	SIG
A_SFWI	Chr24__268160742	268160742	19.6349	-0.0568		0.0014	2.9596	1.92715e-21	SIG
A_SFWI	Chr25__127855263	127855263	9.752	-0.0128	0.0516	0.0008	1.8079	1.77144e-10	SIG
A_SFWI	Chr26__113725691	113725691	9.5901	0.0381		0.0008	1.7424	3.02214e-11	SIG
A_SDWI	Chr1__222393794	222393794	18.0487	0.0308		0.0005	2.1699	7.74363e-20	SIG
A_SDWI	Chr3__585698	585698	14.5884	0.0042	0.0754	0.0006	2.9304	2.58334e-15	SIG
A_SDWI	Chr3__149245037	149245037	8.598	-0.0188	0.0256	0.0003	1.672	2.52545e-09	SIG
A_SDWI	Chr3__275996121	275996121	7.5139	-0.0188		0.0003	1.3173	4.04607e-09	SIG
A_SDWI	Chr4__179019228	179019228	13.5914	-0.0002	0.041	0.0004	1.9889	2.56503e-14	SIG
A_SDWI	Chr5__5073486	5073486	5.0782	-0.015		0.0002	0.7708	1.326e-06	SUG
A_SDWI	Chr5__77600922	77600922	27.4659	-0.0405		0.0007	3.2054	2.41342e-29	SIG
A_SDWI	Chr5__203946306	203946306	28.7798	0.0527	0.0021	0.0006	3.0875	1.66437e-29	SIG
A_SDWI	Chr7__161039925	161039925	18.092	-0.0062	-0.0649	0.0006	3.0827	8.10315e-19	SIG
A_SDWI	Chr10__75947950	75947950	26.165	-0.0044	0.0545	0.0008	4.08	6.85428e-27	SIG
A_SDWI	Chr10__128625232	128625232	20.2702	-0.045	-0.0078	0.0009	4.1941	5.37669e-21	SIG
A_SDWI	Chr11__167300077	167300077	7.3034	-0.0193	0.0168	0.0003	1.5646	4.97627e-08	SIG
A_SDWI	Chr11__254005881	254005881	10.5859	-0.0233		0.0002	1.0925	2.91056e-12	SIG
A_SDWI	Chr12__24504856	24504856	13.75	0.0266		0.0004	1.9255	1.75823e-15	SIG
A_SDWI	Chr13__197488687	197488687	12.2709	-0.0264		0.0006	2.7595	5.59883e-14	SIG
A_SDWI	Chr15__56907777	56907777	7.0206	0.0194		0.0002	0.9892	1.30083e-08	SIG
A_SDWI	Chr15__71277581	71277581	7.4028	-0.0043	0.0607	0.0004	1.8558	3.95828e-08	SIG
A_SDWI	Chr18__242777724	242777724	17.3075	0.0319		0.0004	2.1381	4.35607e-19	SIG
A_SDWI	Chr20__155805329	155805329	12.7239	-0.0032	-0.0748	0.0006	2.6976	1.89043e-13	SIG
A_SDWI	Chr23__234804567	234804567	11.1477	-0.0237		0.0002	1.1573	7.78752e-13	SIG
A_SDWI	Chr25__44306162	44306162	9.9836	0.0278	-0.0209	0.0005	2.3207	1.03941e-10	SIG
A_SDWI	Chr26__144356783	144356783	26.1005	0.0092	0.0542	0.0006	3.1023	7.95182e-27	SIG
A_SDWI	Chr27__155826396	155826396	9.5129	-0.0013	0.0529	0.0004	2.0445	3.07248e-10	SIG
A_SDWI	Chr27__214070767	214070767	11.8148	0.0443	-0.0147	0.0006	2.7272	1.53346e-12	SIG
MFVD	Chr1__98055371	98055371	31.7036	0.0497	0.0288	0.0001	0.5917	1.98404e-32	SIG
MFVD	Chr1__214103597	214103597	28.1588	0.0418		0.0008	3.563	4.83637e-30	SIG
MFVD	Chr2__76533566	76533566	6.7677	0.0264	-0.0044	0.0003	1.2962	1.70806e-07	SUG
MFVD	Chr2__106053210	106053210	14.1813	-0.0112	0.0565	0.0008	3.5766	6.59494e-15	SIG
MFVD	Chr2__266608986	266608986	11.5726	-0.0414	-0.006	0.0005	2.1661	2.67786e-12	SIG
MFVD	Chr3__585698	585698	11.0722	-0.0005	0.0649	0.0005	2.2198	8.47695e-12	SIG
MFVD	Chr3__67107088	67107088	12.2127	0.0247		0.0004	1.8258	6.41543e-14	SIG
MFVD	Chr3__72949036	72949036	12.2482	-0.0268	0.0199	0.0004	1.8227	5.6528e-13	SIG
MFVD	Chr4__262297827	262297827	4.2861	0.0137		0.0001	0.6004	8.88464e-06	SUG
MFVD	Chr5__158699960	158699960	14.1634	0.0008	-0.0361	0.0003	1.3771	6.87312e-15	SIG
MFVD	Chr8__136219302	136219302	31.7315	0.0151	-0.0476	0.0004	1.8332	1.86055e-32	SIG
MFVD	Chr8__259280190	259280190	10.7063	0.0226		0.0005	2.0866	2.1939e-12	SIG
MFVD	Chr10__144472722	144472722	14.303	-0.03	0.0235	0.0007	3.1356	4.98363e-15	SIG
MFVD	Chr12__160025261	160025261	6.5166	0.0304	-0.001	0.0003	1.1169	3.04516e-07	SUG
MFVD	Chr14__234543068	234543068	16.0089	-0.0288		0.0005	2.2286	8.99752e-18	SIG
MFVD	Chr14__286697906	286697906	28.0386	-0.0089	-0.05	0.0005	2.0551	9.17063e-29	SIG
MFVD	Chr16__279042622	279042622	10.1445	-0.0032	-0.0363	0.0003	1.1986	7.17572e-11	SIG
MFVD	Chr18__327209663	327209663	8.2262	-0.0045	0.042	0.0004	1.7214	5.94441e-09	SIG
MFVD	Chr22__163300556	163300556	8.087	-0.0476	-0.0014	0.0004	1.6075	8.19122e-09	SIG
MFVD	Chr24__73151794	73151794	28.8358	-0.0626	-0.0196	0.0006	2.8358	1.46292e-29	SIG
MFVD	Chr24__102318456	102318456	28.9042	-0.0163	-0.0564	0.0005	2.3257	1.24994e-29	SIG
MFVD	Chr25__146961620	146961620	9.3206	0.0066	-0.0454	0.0005	2.0093	4.78295e-10	SIG
MFVD	Chr25__181256156	181256156	16.8277	0.0376	-0.0106	0.0007	3.1559	1.48895e-17	SIG
MFVD	Chr26__113725691	113725691	19.2745	0.0346		0.0007	2.9874	4.4597e-21	SIG
Note: a Logarithm of odds; b Additive effect; c Dominant effect; d R2 represents proportion of phenotypic variation; QTNs with bold characters appear twice or more in single environment analysis. ‘SIG’ and ‘SUG’ equals significant and suggested QTNs respectively.

## Sheet: Table S5
Table S5 Summary of significant and suggested QTNs for drought tolerance-related traits in multiple-environment using 3VmrMLM model
Traits	QTNs	Position (bp)	LODa	Addb	Domc	Variance	R2 (%)d	P value	Significance
F_WI	Chr2__86850961	86850961	6.6015	0.0234	-0.1229	0.0048	0.3126	2.50453e-07	SUG
F_WI	Chr2__106053210	106053210	10.4821	-0.0107	-0.2046	0.007	0.461	3.29828e-11	SIG
F_WI	Chr6__268784715	268784715	21.2686	0.142		0.0094	0.6139	4.30819e-23	SIG
F_WI	Chr7__191421401	191421401	15.9556	-0.1244		0.0064	0.416	1.01886e-17	SIG
F_WI	Chr7__253864058	253864058	8.9017	-0.0185	-0.1901	0.0046	0.3008	1.255e-09	SIG
F_WI	Chr9__95363777	95363777	10.7659	-0.0579	0.1388	0.0094	0.617	1.71589e-11	SIG
F_WI	Chr11__125756751	125756751	22.3231	0.1761	-0.0194	0.0133	0.8702	4.76086e-23	SIG
F_WI	Chr17__338559401	338559401	13.4564	-0.0459	0.2133	0.012	0.7888	3.50047e-14	SIG
F_WI	Chr18__14008831	14008831	10.2776	0.0334	0.1675	0.0044	0.2888	5.28192e-11	SIG
F_WI	Chr19__182192908	182192908	13.5273	-0.1043		0.0068	0.4484	2.95957e-15	SIG
F_WI	Chr22__45047976	45047976	9.8493	0.0894		0.0052	0.338	1.64271e-11	SIG
F_WI	Chr22__160410502	160410502	13.383	0.0032	0.1718	0.0067	0.4413	4.14502e-14	SIG
F_WI	Chr22__201784939	201784939	25.2089	0.1039	0.2963	0.0053	0.3489	6.19464e-26	SIG
F_WI	Chr23__45962614	45962614	9.5534	0.0877		0.0034	0.2258	3.29463e-11	SIG
F_WI	Chr23__110579941	110579941	12.994	-0.1023		0.0044	0.2901	1.03038e-14	SIG
F_WI	Chr24__115918888	115918888	10.8014	-0.0947		0.005	0.325	1.75506e-12	SIG
F_WI	Chr24__278723939	278723939	22.5133	-0.1475	0.1486	0.0103	0.6737	3.07268e-23	SIG
F_WI	Chr25__25295499	25295499	10.8852	-0.0948		0.0059	0.3835	1.44149e-12	SIG
F_WI	Chr25__211042485	211042485	11.3569	-0.1723	0.0297	0.0091	0.5955	4.40033e-12	SIG
F_WI	Chr26__95328912	95328912	17.3327	0.1572	-0.0109	0.0078	0.5138	4.65475e-18	SIG
F_WI	Chr27__191718985	191718985	15.273	-0.117		0.007	0.4563	5.01134e-17	SIG
F_PH	Chr2__91660337	91660337	39.9766	0.1986	1.1263	0.2112	2.1162	1.05891e-40	SIG
F_PH	Chr2__115624958	115624958	19.1318	0.0592	0.7157	0.1063	1.0651	7.39426e-20	SIG
F_PH	Chr2__169048047	169048047	29.8215	0.4025	0.6424	0.0215	0.2158	1.51227e-30	SIG
F_PH	Chr2__238152344	238152344	26.943	0.7249	-0.0076	0.1614	1.617	1.14287e-27	SIG
F_PH	Chr3__37214369	37214369	28.1298	0.5728		0.2823	2.8282	5.17289e-30	SIG
F_PH	Chr3__279928373	279928373	20.1273	0.2108	0.5418	0.0402	0.4027	7.4715e-21	SIG
F_PH	Chr6__189413986	189413986	23.187	0.5263		0.2605	2.6096	4.98387e-25	SIG
F_PH	Chr9__80117750	80117750	18.645	-0.4546		0.1376	1.379	1.93128e-20	SIG
F_PH	Chr9__116657327	116657327	13.6242	0.0932	-0.9803	0.1436	1.4388	2.37837e-14	SIG
F_PH	Chr10__227490748	227490748	8.9994	0.4765	-0.1749	0.0938	0.9401	1.00213e-09	SIG
F_PH	Chr11__7607481	7607481	16.5523	-1.3637	-0.0757	0.1625	1.6279	2.80766e-17	SIG
F_PH	Chr11__54182023	54182023	22.0347	0.2729	0.8869	0.1022	1.0234	9.25038e-23	SIG
F_PH	Chr12__203004016	203004016	4.7873	-0.0861	0.6515	0.0526	0.5271	1.63262e-05	SUG
F_PH	Chr14__6165751	6165751	20.6777	0.5018		0.0926	0.9275	1.7028e-22	SIG
F_PH	Chr14__232862961	232862961	6.0931	0.2539		0.0632	0.6333	1.17681e-07	SIG
F_PH	Chr14__243750206	243750206	21.8835	-0.046	-0.745	0.1297	1.2991	1.31009e-22	SIG
F_PH	Chr14__299621237	299621237	12.0748	-0.2621	0.6603	0.1176	1.1779	8.42578e-13	SIG
F_PH	Chr16__21249187	21249187	55.7787	0.2179	-0.9419	0.101	1.0117	1.6726e-56	SIG
F_PH	Chr17__339244693	339244693	31.3262	0.1965	-0.9303	0.2984	2.9892	4.73136e-32	SIG
F_PH	Chr18__334306853	334306853	16.956	-0.1271	0.7426	0.1519	1.5221	1.10827e-17	SIG
F_PH	Chr19__48470759	48470759	16.7344	-0.5855	-0.1128	0.1137	1.1394	1.84587e-17	SIG
F_PH	Chr19__55022146	55022146	19.9185	0.6488	0.2706	0.0666	0.6674	1.2085e-20	SIG
F_PH	Chr22__83920183	83920183	80.7516	-1.4064	-0.5883	0.3321	3.3275	1.78376e-81	SIG
F_PH	Chr23__133359036	133359036	14.0749	0.4306		0.1112	1.1141	8.22674e-16	SIG
F_PH	Chr23__221166188	221166188	13.6473	0.202	0.7366	0.0982	0.9841	2.25552e-14	SIG
F_PH	Chr23__253564186	253564186	7.6483	0.5045	-0.085	0.0893	0.8949	2.2488e-08	SIG
F_PH	Chr25__35158285	35158285	8.5185	0.0667	-0.7148	0.0909	0.911	3.03265e-09	SIG
F_PH	Chr25__38860133	38860133	12.2833	0.417	-0.2199	0.0812	0.8133	5.21396e-13	SIG
F_PH	Chr26__181687742	181687742	8.343	-0.2183	0.4929	0.0924	0.9261	4.54282e-09	SIG
F_SFW	Chr1__60835462	60835462	18.8126	0.1314	0.0161	0.0035	0.2963	1.5421e-19	SIG
F_SFW	Chr1__172692198	172692198	25.2861	-0.134		0.0076	0.6354	3.80246e-27	SIG
F_SFW	Chr2__93719052	93719052	6.9906	0.0947	-0.0015	0.0027	0.2273	1.02238e-07	SIG
F_SFW	Chr2__264584811	264584811	24.2613	-0.0111	0.1722	0.0079	0.6615	5.49092e-25	SIG
F_SFW	Chr3__202210521	202210521	5.6201	0.0603		0.0026	0.2165	3.63226e-07	SUG
F_SFW	Chr4__209342141	209342141	6.5194	-0.0616		0.0034	0.2859	4.27243e-08	SIG
F_SFW	Chr4__253186881	253186881	11.2157	0.0067	0.1134	0.0029	0.2433	6.09113e-12	SIG
F_SFW	Chr6__16295780	16295780	11.296	-0.1426	-0.0041	0.0058	0.4856	5.06358e-12	SIG
F_SFW	Chr7__253790865	253790865	7.9301	0.0701		0.0047	0.3949	1.51238e-09	SIG
F_SFW	Chr8__223542180	223542180	10.7569	-0.0191	0.0999	0.0027	0.2244	1.75169e-11	SIG
F_SFW	Chr11__109751144	109751144	13.0869	-0.0892		0.0045	0.3809	8.2902e-15	SIG
F_SFW	Chr13__313106916	313106916	9.5997	-0.083		0.0049	0.4078	2.95515e-11	SIG
F_SFW	Chr15__291210825	291210825	13.0532	-0.0051	0.1936	0.0068	0.5693	8.85771e-14	SIG
F_SFW	Chr17__240010284	240010284	12.5258	-0.1268	0.0301	0.0075	0.6262	2.98329e-13	SIG
F_SFW	Chr19__1003702	1003702	16.652	0.1015		0.0063	0.5279	2.00785e-18	SIG
F_SFW	Chr23__234804567	234804567	16.6703	-0.1039		0.0046	0.3866	1.92372e-18	SIG
F_SFW	Chr25__101017376	101017376	13.5942	-0.0911		0.0053	0.4456	2.53093e-15	SIG
F_SFW	Chr27__34606699	34606699	9.6402	0.0358	0.1938	0.0027	0.23	2.29189e-10	SIG
F_SDW	Chr2__93719052	93719052	25.6969	0.0413	0.0057	0.0004	1.9681	2.01411e-26	SIG
F_SDW	Chr3__142537455	142537455	12.4627	0.0027	0.0435	0.0003	1.2688	3.44966e-13	SIG
F_SDW	Chr3__267999872	267999872	7.5502	-0.0065	0.0344	0.0002	1.0367	2.81879e-08	SIG
F_SDW	Chr3__276992970	276992970	9.8263	-0.0028	0.0275	0.0002	1.0266	1.49311e-10	SIG
F_SDW	Chr4__249766617	249766617	22.8823	-0.0025	0.0394	0.0004	1.9912	1.31394e-23	SIG
F_SDW	Chr5__152525167	152525167	17.3379	-0.0225		0.0002	1.0584	4.05801e-19	SIG
F_SDW	Chr5__161303886	161303886	10.902	0.0002	0.0247	0.0002	0.7333	1.25419e-11	SIG
F_SDW	Chr6__278291050	278291050	15.0675	0.0246	0.0066	0.0001	0.4237	8.57203e-16	SIG
F_SDW	Chr7__217703137	217703137	14.0195	0.0211		0.0002	1.1322	9.36414e-16	SIG
F_SDW	Chr11__54191307	54191307	20.54	-0.0255		0.0003	1.2683	2.34598e-22	SIG
F_SDW	Chr12__211703545	211703545	11.3285	-0.0037	0.0553	0.0003	1.6182	4.69832e-12	SIG
F_SDW	Chr13__316613665	316613665	51.4451	-0.0027	-0.0472	0.0003	1.4351	3.60386e-52	SIG
F_SDW	Chr14__179983930	179983930	14.1158	-0.0239	0.0089	0.0002	0.9185	7.66846e-15	SIG
F_SDW	Chr14__301780241	301780241	17.261	0.0324	-0.0059	0.0005	2.6311	5.4907e-18	SIG
F_SDW	Chr15__213989559	213989559	4.4528	0.0004	0.032	0.0001	0.5375	3.52668e-05	SUG
F_SDW	Chr16__125764264	125764264	55.6945	0.0027	-0.0586	0.0009	4.3043	2.0304e-56	SIG
F_SDW	Chr17__244298352	244298352	33.0334	0.0338		0.0004	2.1363	5.96844e-35	SIG
F_SDW	Chr17__252381770	252381770	42.809	0.0128	-0.0571	0.0011	5.4393	1.55814e-43	SIG
F_SDW	Chr21__80045548	80045548	15.353	0.0213		0.0004	1.8153	4.15814e-17	SIG
F_SDW	Chr23__158460323	158460323	10.8222	0.0221	-0.007	0.0003	1.5388	1.50725e-11	SIG
F_SDW	Chr23__290785454	290785454	12.58	-0.0008	0.0233	0.0001	0.6036	2.63292e-13	SIG
F_SDW	Chr24__190683359	190683359	21.1022	-0.0034	0.03	0.0002	0.9254	7.91713e-22	SIG
F_SDW	Chr25__103279552	103279552	43.7514	0.0055	0.0866	0.0011	5.3995	1.77904e-44	SIG
F_SDW	Chr25__183214918	183214918	14.3298	0.0044	0.0407	0.0002	1.1775	4.68471e-15	SIG
F_SDW	Chr26__11340638	11340638	12.7672	-0.0192		0.0003	1.3926	1.75158e-14	SIG
F_SDW	Chr27__34036117	34036117	12.0756	-0.0183		0.0002	0.9192	8.8455e-14	SIG
A_WI	Chr1__213459031	213459031	17.3858	-0.025	0.1647	0.0067	0.499	4.11995e-18	SIG
A_WI	Chr2__106053210	106053210	11.142	-0.0752	-0.1797	0.0041	0.3028	7.21851e-12	SIG
A_WI	Chr2__146743912	146743912	13.0693	-0.0559	-0.1749	0.006	0.4452	8.53433e-14	SIG
A_WI	Chr3__151378875	151378875	17.3167	-0.1373		0.0144	1.0718	4.26299e-19	SIG
A_WI	Chr4__24987793	24987793	34.51	-0.2763	-0.0251	0.0214	1.5883	3.09918e-35	SIG
A_WI	Chr4__128645246	128645246	11.4478	-0.1046		0.0045	0.3372	3.85244e-13	SIG
A_WI	Chr7__34470688	34470688	17.3907	-0.1705	0.0233	0.0115	0.8529	4.07372e-18	SIG
A_WI	Chr9__95363777	95363777	30.9423	0.0714	0.2834	0.0121	0.8945	1.14517e-31	SIG
A_WI	Chr10__284130957	284130957	23.2959	0.2498	0.108	0.007	0.5216	5.0689e-24	SIG
A_WI	Chr13__15762044	15762044	12.9853	-0.1476	0.0195	0.0134	0.9973	1.03569e-13	SIG
A_WI	Chr15__224740673	224740673	35.5368	0.2038		0.0147	1.0914	1.80663e-37	SIG
A_WI	Chr16__227004850	227004850	18.7171	-0.0702	-0.2923	0.0112	0.8284	1.92138e-19	SIG
A_WI	Chr20__226689134	226689134	16.7954	-0.032	0.1638	0.0073	0.543	1.60414e-17	SIG
A_WI	Chr21__172499992	172499992	19.3492	0.14		0.0095	0.7083	3.74796e-21	SIG
A_WI	Chr23__289515135	289515135	13.7011	-0.1372	0.0083	0.005	0.3742	1.99259e-14	SIG
A_WI	Chr24__115918888	115918888	23.1305	-0.1527		0.013	0.961	5.68351e-25	SIG
A_WI	Chr25__60694702	60694702	10.3155	0.1375	-0.0775	0.0106	0.7852	4.84004e-11	SIG
A_WI	Chr26__151660395	151660395	11.8968	0.0318	0.2461	0.0074	0.5514	1.26961e-12	SIG
A_WI	Chr27__139812481	139812481	8.1615	-0.0874		0.0064	0.4761	8.75687e-10	SIG
A_WI	Chr27__191718985	191718985	9.8115	-0.0975		0.0049	0.3609	1.79568e-11	SIG
A_PH	Chr1__96817066	96817066	9.2051	-0.0781	0.4295	0.0584	0.5225	6.24073e-10	SIG
A_PH	Chr1__162741069	162741069	12.6604	-0.5025	-0.116	0.0481	0.4302	2.18811e-13	SIG
A_PH	Chr1__189627242	189627242	7.386	-0.4477	-0.0883	0.0756	0.676	4.11417e-08	SIG
A_PH	Chr2__86336005	86336005	13.6945	-0.4107		0.0822	0.7347	2.00201e-15	SIG
A_PH	Chr2__115624958	115624958	29.1062	-0.0803	0.8961	0.2268	2.0287	7.851e-30	SIG
A_PH	Chr2__152815646	152815646	10.4257	0.3313		0.0884	0.7909	4.2401e-12	SIG
A_PH	Chr4__181106609	181106609	18.5432	-0.1104	0.8041	0.1781	1.5931	2.86727e-19	SIG
A_PH	Chr5__34141690	34141690	14.5822	-0.4175	0.2327	0.0543	0.4856	2.62001e-15	SIG
A_PH	Chr8__32685566	32685566	21.2613	-0.528		0.1918	1.7157	4.38193e-23	SIG
A_PH	Chr9__76628692	76628692	19.2435	0.4606		0.1265	1.1314	4.79321e-21	SIG
A_PH	Chr9__80117750	80117750	12.153	-0.3547		0.0835	0.7467	7.37808e-14	SIG
A_PH	Chr9__101675030	101675030	17.7601	0.4576		0.1325	1.1847	1.51701e-19	SIG
A_PH	Chr9__103556733	103556733	40.5979	-0.7817	-0.295	0.0606	0.5422	2.53305e-41	SIG
A_PH	Chr9__109461294	109461294	11.2019	0.3552		0.0589	0.527	6.85761e-13	SIG
A_PH	Chr9__151844558	151844558	15.5718	-0.0012	1.0636	0.1559	1.3938	2.68386e-16	SIG
A_PH	Chr9__208102347	208102347	5.03	-0.2205		0.0253	0.226	1.48813e-06	SUG
A_PH	Chr10__47765918	47765918	68.6309	0.1172	1.1983	0.279	2.4947	2.35317e-69	SIG
A_PH	Chr12__47194161	47194161	11.9072	0.1715	0.9091	0.0692	0.6185	1.23941e-12	SIG
A_PH	Chr12__203004016	203004016	18.7265	-0.1021	1.386	0.2157	1.9287	1.88004e-19	SIG
A_PH	Chr13__146140425	146140425	14.9631	-0.248	0.8822	0.1711	1.5304	1.09018e-15	SIG
A_PH	Chr14__6165751	6165751	27.6077	0.5858		0.1272	1.1376	1.73675e-29	SIG
A_PH	Chr14__60967743	60967743	17.7566	-0.448		0.0976	0.8727	1.52961e-19	SIG
A_PH	Chr14__72794423	72794423	11.1219	-0.4563	0.0413	0.0917	0.8197	7.55972e-12	SIG
A_PH	Chr15__297474558	297474558	19.8154	0.4943		0.1262	1.1289	1.26619e-21	SIG
A_PH	Chr17__339244693	339244693	30.3622	0.0585	-0.9194	0.2324	2.0786	4.35414e-31	SIG
A_PH	Chr22__145815947	145815947	16.4586	-0.4151		0.1226	1.0961	3.15187e-18	SIG
A_PH	Chr22__146457260	146457260	8.043	-0.2221	0.601	0.0844	0.7551	9.0625e-09	SIG
A_PH	Chr22__191998625	191998625	7.4957	0.4923	0.0499	0.0893	0.7982	3.19608e-08	SIG
A_PH	Chr24__129029054	129029054	26.4326	-0.7364	0.3027	0.2827	2.5285	3.70175e-27	SIG
A_PH	Chr25__35158285	35158285	6.0703	0.1405	-0.5224	0.0667	0.5967	8.50999e-07	SUG
A_PH	Chr25__38860133	38860133	9.6426	0.1815	-0.5601	0.1057	0.9455	2.27911e-10	SIG
A_PH	Chr25__153920740	153920740	4.9387	0.3703	0.0929	0.0506	0.4523	1.15202e-05	SUG
A_PH	Chr26__213079381	213079381	7.8018	-0.2794		0.0458	0.4091	2.04812e-09	SIG
A_SFW	Chr1__172692198	172692198	17.2151	-0.0892		0.0034	0.4777	5.40219e-19	SIG
A_SFW	Chr1__237558323	237558323	14.9396	0.0126	0.1217	0.003	0.4321	1.1507e-15	SIG
A_SFW	Chr2__93655571	93655571	10.4667	-0.065		0.0025	0.3513	3.85016e-12	SIG
A_SFW	Chr2__180332396	180332396	15.5582	-0.0836		0.0065	0.924	2.57565e-17	SIG
A_SFW	Chr4__11990315	11990315	10.7787	0.0683		0.0037	0.5222	1.8508e-12	SIG
A_SFW	Chr4__249766617	249766617	13.8657	0.0056	0.1148	0.0032	0.4536	1.36397e-14	SIG
A_SFW	Chr5__162846337	162846337	14.0653	-0.0228	-0.1846	0.004	0.5739	8.61418e-15	SIG
A_SFW	Chr6__265523897	265523897	10.144	-0.0215	0.102	0.0035	0.4957	7.18364e-11	SIG
A_SFW	Chr7__217703207	217703207	9.907	-0.0669		0.0031	0.434	1.43437e-11	SIG
A_SFW	Chr9__103730788	103730788	24.311	-0.1063		0.0112	1.5935	3.66054e-26	SIG
A_SFW	Chr11__269965111	269965111	20.267	-0.1015		0.0101	1.4317	4.42784e-22	SIG
A_SFW	Chr12__68514490	68514490	6.7817	0.0523		0.0019	0.27	2.29231e-08	SIG
A_SFW	Chr14__282453092	282453092	22.6273	0.1011		0.0055	0.7752	1.83018e-24	SIG
A_SFW	Chr15__54902024	54902024	6.84	-0.0144	0.1306	0.0027	0.3852	1.44627e-07	SIG
A_SFW	Chr16__24277052	24277052	8.9254	-0.066		0.0036	0.5103	1.44523e-10	SIG
A_SFW	Chr17__304643214	304643214	11.0718	0.0733		0.0036	0.5172	9.30384e-13	SIG
A_SFW	Chr18__295188377	295188377	30.5467	0.057	0.1712	0.0041	0.5874	2.84702e-31	SIG
A_SFW	Chr18__335642526	335642526	8.7202	-0.0707	0.0428	0.0026	0.3744	1.90609e-09	SIG
A_SFW	Chr19__162395008	162395008	18.3958	-0.039	-0.2311	0.0048	0.6813	4.02591e-19	SIG
A_SFW	Chr20__208813985	208813985	13.2284	0.014	0.1648	0.0037	0.5321	5.91668e-14	SIG
A_SFW	Chr24__61750679	61750679	7.7973	0.0575		0.003	0.4222	2.0702e-09	SIG
A_SFW	Chr24__211879768	211879768	8.0757	-0.0602		0.0028	0.3965	1.07238e-09	SIG
A_SFW	Chr25__80485657	80485657	18.3056	-0.092		0.003	0.4273	4.25692e-20	SIG
A_SFW	Chr26__117541238	117541238	24.2762	0.1035		0.0056	0.7913	3.96824e-26	SIG
A_SFW	Chr26__125765974	125765974	12.1319	-0.0773		0.0038	0.541	7.75359e-14	SIG
A_SDW	Chr2__93719052	93719052	24.5896	0.0391	-0.0106	0.0007	2.9516	2.5782e-25	SIG
A_SDW	Chr2__222932926	222932926	10.9764	-0.0174		0.0001	0.5321	1.1638e-12	SIG
A_SDW	Chr3__4634907	4634907	25.8952	-0.0279		0.0003	1.2955	9.24494e-28	SIG
A_SDW	Chr4__31068965	31068965	14.2861	-0.0206		0.0002	0.7529	5.02236e-16	SIG
A_SDW	Chr4__200115016	200115016	16.6618	-0.0124	0.0479	0.0005	2.2769	2.18162e-17	SIG
A_SDW	Chr4__253587308	253587308	16.7795	-0.0021	0.0315	0.0003	1.1655	1.66386e-17	SIG
A_SDW	Chr4__264929749	264929749	61.3924	0.0341	0.0603	0.0002	0.9271	4.0726e-62	SIG
A_SDW	Chr8__157326278	157326278	9.0944	0.0027	0.0522	0.0002	1.0413	8.05192e-10	SIG
A_SDW	Chr10__114283349	114283349	6.1608	-0.0137		0.0001	0.6486	1.00179e-07	SIG
A_SDW	Chr13__294992274	294992274	8.0617	0.0153		0.0001	0.5779	1.10846e-09	SIG
A_SDW	Chr14__60967743	60967743	18.6614	-0.0239		0.0003	1.2359	1.85888e-20	SIG
A_SDW	Chr14__179983947	179983947	27.6094	-0.0321		0.0006	2.4966	1.72996e-29	SIG
A_SDW	Chr15__71104953	71104953	9.431	-0.0015	0.027	0.0002	0.8373	3.71011e-10	SIG
A_SDW	Chr15__291210825	291210825	9.0642	-0.0099	0.0287	0.0003	1.1448	8.63215e-10	SIG
A_SDW	Chr16__67971504	67971504	8.4903	0.016		0.0001	0.6071	4.03094e-10	SIG
A_SDW	Chr16__125764264	125764264	41.027	-0.0076	-0.0474	0.0004	1.8985	9.4297e-42	SIG
A_SDW	Chr18__19367077	19367077	16.218	-0.008	0.0657	0.0005	2.1917	6.06162e-17	SIG
A_SDW	Chr18__261238086	261238086	18.4285	0.0233		0.0002	0.925	3.19721e-20	SIG
A_SDW	Chr22__65699079	65699079	13.7496	-0.0207		0.0003	1.1218	1.75987e-15	SIG
A_SDW	Chr22__210759859	210759859	30.1849	0.0314		0.0004	1.5664	4.40097e-32	SIG
A_SDW	Chr22__217026448	217026448	13.17	-0.021		0.0002	0.7496	6.8259e-15	SIG
A_SDW	Chr23__146567353	146567353	25.1521	0.0329	0.0221	0.0001	0.3329	7.0604e-26	SIG
A_SDW	Chr23__267234989	267234989	6.6378	-0.0289	-0.0042	0.0002	0.7977	2.30404e-07	SUG
A_SDW	Chr23__290785454	290785454	6.7204	-0.0134	0.0139	0.0001	0.6582	1.90461e-07	SUG
A_SDW	Chr27__148805349	148805349	22.173	-0.0262		0.0005	2.4097	5.2606e-24	SIG
A_SDW	Chr27__150820215	150820215	15.7751	-0.0022	-0.0263	0.0001	0.6135	1.68051e-16	SIG
A_SDW	Chr27__158584056	158584056	21.3794	0.0384	0.0007	0.0005	2.1826	4.18213e-22	SIG
A_SDW	Chr27__191013807	191013807	6.4583	-0.0224	0.0022	0.0002	0.809	3.48269e-07	SUG
Note:a Logarithm of odds; b Additive effect; c Dominant effect; d R2 represents phenotypic effects; QTNs with bold characters appear twice or more in multiple environments analysis. ‘SIG’ and ‘SUG’ equals significant and suggested QTNs respectively.

## Sheet: Table S6
Table S6 The detected QTN-by-environment interactions for drought tolerance- related traits under multiple environments analysis
Traits	QEIs	Position (bp)	LOD (QE)	Add×Env1a	Dom×Env1b	variance	R2 (%)c	P-value	Significanced
F_WI	Chr1__254635990	254635990	8.6443	-0.0471	0.1248	0.0069	0.4535	2.26991e-09	SIG
F_WI	Chr3__288637297	288637297	7.911	0.0825		0.0068	0.4455	1.58252e-09	SIG
F_WI	Chr5__110219202	110219202	12.5322	0.0491	0.2076	0.0106	0.6974	2.9391e-13	SIG
F_WI	Chr5__169353215	169353215	10.716	-0.0164	0.1714	0.0096	0.6295	1.92475e-11	SIG
F_WI	Chr6__268784715	268784715	11.082	0.0992		0.0098	0.6445	9.08458e-13	SIG
F_WI	Chr7__231047093	231047093	45.0916	0.2346	0.105	0.047	3.0786	8.12963e-46	SIG
F_WI	Chr9__38492091	38492091	17.2861	0.031	-0.1791	0.0157	1.0276	5.18291e-18	SIG
F_WI	Chr9__95363777	95363777	10.5628	-0.0465	0.1423	0.0103	0.674	2.73896e-11	SIG
F_WI	Chr10__240678284	240678284	11.8736	0.0018	0.1532	0.0099	0.6505	1.33924e-12	SIG
F_WI	Chr12__36765745	36765745	31.1195	0.1927	-0.0097	0.0333	2.1828	7.61406e-32	SIG				S
F_WI	Chr13__282214686	282214686	8.3284	0.1339	0.0302	0.0071	0.4619	4.69842e-09	SIG
F_WI	Chr14__241103942	241103942	11.9781	0.101		0.0102	0.6681	1.11159e-13	SIG
F_WI	Chr15__74605217	74605217	6.4435	0.0706		0.005	0.3261	5.11604e-08	SIG
F_WI	Chr15__224740673	224740673	16.6283	0.1237		0.0153	1.0023	2.12165e-18	SIG
F_WI	Chr18__14008831	14008831	6.3064	-0.0224	0.1309	0.0059	0.3864	4.94076e-07	SUG
F_WI	Chr18__333348032	333348032	13.6914	-0.058	0.1585	0.0115	0.7545	2.03751e-14	SIG
F_WI	Chr21__201934571	201934571	9.3657	-0.0204	0.1223	0.0082	0.5355	4.31167e-10	SIG
F_WI	Chr22__140486474	140486474	6.945	0.0773	-0.0734	0.0057	0.3729	1.1358e-07	SIG
F_WI	Chr22__201784939	201784939	11.4889	-0.0565	0.2098	0.0093	0.6104	3.24755e-12	SIG
F_WI	Chr24__217488777	217488777	4.8749	-0.0104	0.1669	0.0046	0.3	1.33447e-05	SUG
F_WI	Chr24__262375885	262375885	7.5489	0.0779		0.0061	0.3977	3.72465e-09	SIG
F_WI	Chr25__60694702	60694702	5.4209	0.1087	-0.0312	0.0048	0.3157	3.79603e-06	SUG
F_WI	Chr27__58232617	58232617	9.1016	0.0875		0.0077	0.5013	9.54373e-11	SIG
F_PH	Chr1__174486633	174486633	9.7129	0.3435		0.118	1.1822	2.2642e-11	SIG
F_PH	Chr11__124432068	124432068	7.744	0.2798		0.0783	0.7841	2.34809e-09	SIG
F_PH	Chr16__214738761	214738761	6.044	0.2465		0.0608	0.6087	1.32278e-07	SIG
F_PH	Chr19__138115623	138115623	5.1045	-0.5593	0.0767	0.0524	0.5254	7.86436e-06	SUG
F_PH	Chr26__122124698	122124698	5.1326	0.2371		0.0562	0.5632	1.16425e-06	SUG
F_PH	Chr26__183163437	183163437	7.2008	0.2708		0.0733	0.7346	8.48916e-09	SIG
F_SFW	Chr1__60835429	60835429	13.9612	-0.1118	0.0011	0.0091	0.7679	1.09485e-14	SIG
F_SFW	Chr2__28439837	28439837	13.2259	0.0052	-0.1458	0.0089	0.7508	5.95105e-14	SIG
F_SFW	Chr2__168206757	168206757	9.3672	-0.0754		0.0057	0.4774	5.10652e-11	SIG
F_SFW	Chr5__166087229	166087229	11.9316	0.007	-0.1479	0.0082	0.6887	1.17172e-12	SIG
F_SFW	Chr8__259280190	259280190	4.8106	0.0525		0.0028	0.2316	2.51793e-06	SUG
F_SFW	Chr11__184516226	184516226	5.9149	-0.0678	0.045	0.0034	0.2852	1.21698e-06	SUG
F_SFW	Chr12__130068139	130068139	8.2789	-0.0088	-0.1597	0.0051	0.4263	5.26554e-09	SIG
F_SFW	Chr12__162586707	162586707	12.4302	-0.0863		0.0074	0.6249	3.85515e-14	SIG
F_SFW	Chr13__51851258	51851258	8.4006	-0.0823	0.0232	0.0051	0.428	3.97819e-09	SIG
F_SFW	Chr14__8829618	8829618	19.1312	0.0636	-0.2217	0.0137	1.1498	7.4052e-20	SIG
F_SFW	Chr14__302132429	302132429	19.5984	-0.1422	0.0394	0.0145	1.2199	2.52538e-20	SIG
F_SFW	Chr16__79551002	79551002	19.0395	-0.1391	0.0569	0.0135	1.1294	9.14478e-20	SIG
F_SFW	Chr16__125764264	125764264	11.6707	-0.0579	0.0965	0.007	0.5838	2.13662e-12	SIG
F_SFW	Chr22__220727657	220727657	12.5319	-0.1112	0.0214	0.0078	0.6519	2.94158e-13	SIG
F_SFW	Chr23__134898907	134898907	10.1956	-0.0805		0.0065	0.5441	7.27996e-12	SIG
F_SFW	Chr23__291892711	291892711	6.8436	-0.0627		0.0039	0.3301	1.97923e-08	SIG
F_SFW	Chr24__34036379	34036379	20.308	-0.1147		0.0132	1.1049	4.02422e-22	SIG
F_SFW	Chr25__183214918	183214918	24.0004	-0.0586	-0.2338	0.0157	1.3157	1.00119e-24	SIG
F_SFW	Chr26__118259380	118259380	21.1478	-0.0787	-0.2378	0.0154	1.2961	7.12754e-22	SIG
F_SDW	Chr3__110048481	110048481	4.7294	-0.0113		0.0001	0.6206	3.0592e-06	SUG
F_SDW	Chr10__248655765	248655765	9.8151	-0.0053	-0.0265	0.0003	1.469	1.53192e-10	SIG
F_SDW	Chr11__160988059	160988059	13.2138	0.0193		0.0004	1.8102	6.1609e-15	SIG
F_SDW	Chr12__177914032	177914032	9.2364	0.017		0.0003	1.4031	6.94839e-11	SIG
F_SDW	Chr13__126423243	126423243	7.542	0.0147		0.0002	1.0543	3.78561e-09	SIG
F_SDW	Chr15__214917841	214917841	15.4538	0.0212		0.0004	2.1838	3.28616e-17	SIG
F_SDW	Chr16__232543960	232543960	6.7791	-0.0149		0.0002	1.0814	2.30648e-08	SIG
F_SDW	Chr17__228430286	228430286	11.8663	-0.0271	-0.0012	0.0003	1.6205	1.36175e-12	SIG
F_SDW	Chr25__37105663	37105663	4.295	0.0108		0.0001	0.5684	8.69522e-06	SUG
F_SDW	Chr27__117278694	117278694	17.5475	0.0261	0.0046	0.0005	2.6466	2.83883e-18	SIG
A_WI	Chr5__169353215	169353215	11.3371	-0.1102	0.0995	0.0114	0.8485	4.60624e-12	SIG
A_WI	Chr8__144798145	144798145	9.1269	0.0981		0.0096	0.7134	8.99049e-11	SIG
A_WI	Chr10__124180108	124180108	4.5524	-0.0461	0.1026	0.0042	0.3145	2.80404e-05	SUG
A_WI	Chr10__240678284	240678284	8.279	-0.0802	0.0955	0.0076	0.5622	5.26389e-09	SIG
A_WI	Chr10__259285856	259285856	11.1745	-0.1055		0.0111	0.8252	7.31242e-13	SIG
A_WI	Chr12__247715854	247715854	36.0644	0.1066	0.2683	0.0394	2.9238	8.64761e-37	SIG
A_WI	Chr14__5605892	5605892	12.4303	0.1336	-0.0311	0.0137	1.0192	3.71686e-13	SIG
A_WI	Chr14__283776194	283776194	8.5728	0.1163	-0.0546	0.0088	0.6547	2.67617e-09	SIG
A_WI	Chr15__224740673	224740673	20.7822	0.1484		0.022	1.6337	1.3354e-22	SIG
A_WI	Chr15__239636786	239636786	13.7437	0.1209		0.0146	1.0852	1.78435e-15	SIG
A_WI	Chr16__63092510	63092510	21.4558	0.1629	0.0144	0.022	1.634	3.50738e-22	SIG
A_WI	Chr16__279042622	279042622	16.4011	-0.0023	0.2042	0.018	1.3348	3.97679e-17	SIG
A_WI	Chr17__18678198	18678198	46.643	-0.0142	-0.3898	0.0635	4.711	2.28425e-47	SIG
A_WI	Chr19__215484175	215484175	11.9041	-0.0191	0.2264	0.0123	0.9112	1.24828e-12	SIG
A_WI	Chr19__224581682	224581682	11.3699	0.1042		0.0109	0.8061	4.62422e-13	SIG
A_WI	Chr20__53310555	53310555	15.4151	-0.0308	0.1907	0.0151	1.1219	3.85046e-16	SIG
A_WI	Chr22__91199469	91199469	26.0424	0.1994	0.0296	0.0281	2.0812	9.0906e-27	SIG
A_WI	Chr23__255122841	255122841	7.0126	0.0314	0.2458	0.007	0.5169	9.7209e-08	SIG
A_WI	Chr24__102318456	102318456	13.4174	-0.007	0.154	0.0123	0.9104	3.82943e-14	SIG
A_WI	Chr24__300974094	300974094	31.5428	-0.1486	0.2861	0.038	2.8187	2.87326e-32	SIG
A_WI	Chr25__60694702	60694702	17.4974	0.0592	-0.1654	0.0188	1.3977	3.18569e-18	SIG
A_WI	Chr25__212760142	212760142	6.4497	-0.0888	0.0476	0.006	0.4484	3.55223e-07	SUG
A_PH	Chr3__77907926	77907926	8.8615	-0.3285		0.1079	0.9652	1.68012e-10	SIG
A_PH	Chr4__171786531	171786531	12.5528	-0.3599		0.1295	1.1584	2.89324e-14	SIG
A_PH	Chr8__144464446	144464446	4.9838	0.237		0.0562	0.5025	1.66238e-06	SUG
A_PH	Chr9__109285034	109285034	8.3783	0.2934		0.0861	0.7698	5.24942e-10	SIG
A_PH	Chr10__92272995	92272995	4.2825	-0.203		0.0412	0.3686	8.96059e-06	SUG
A_PH	Chr13__238110500	238110500	9.1684	-0.3017		0.091	0.8142	8.15507e-11	SIG
A_PH	Chr16__277785796	277785796	9.2756	-0.3247		0.1055	0.9431	6.33485e-11	SIG
A_PH	Chr27__118428038	118428038	12.1834	-0.383		0.1467	1.3116	6.87155e-14	SIG
A_SFW	Chr1__134942938	134942938	13.336	-0.0773		0.006	0.8485	4.62926e-15	SIG
A_SFW	Chr3__585698	585698	8.6715	0.0298	0.1481	0.0038	0.5402	2.13235e-09	SIG
A_SFW	Chr3__125998680	125998680	5.7547	0.0503		0.0025	0.3594	2.63457e-07	SUG
A_SFW	Chr5__190193813	190193813	14.5769	-0.0799		0.0064	0.9078	2.54601e-16	SIG
A_SFW	Chr5__256826584	256826584	9.7318	-0.1172	0.0204	0.004	0.5708	1.85604e-10	SIG
A_SFW	Chr9__121743537	121743537	13.5792	0.0875	-0.0136	0.0057	0.803	2.63826e-14	SIG
A_SFW	Chr12__82559922	82559922	8.7563	-0.0268	0.0969	0.0042	0.598	1.75406e-09	SIG
A_SFW	Chr13__294992310	294992310	4.4727	0.0432		0.0019	0.2656	5.66938e-06	SUG
A_SFW	Chr14__5605892	5605892	15.0283	-0.101	0.0066	0.0077	1.0978	9.38168e-16	SIG
A_SFW	Chr15__184553916	184553916	9.0759	0.0049	-0.1172	0.004	0.572	8.40289e-10	SIG
A_SFW	Chr16__302555196	302555196	7.7435	0.0114	-0.1305	0.0037	0.5254	1.80631e-08	SIG
A_SFW	Chr17__260900946	260900946	10.1106	-0.067		0.0045	0.6376	8.88877e-12	SIG
A_SFW	Chr18__300164469	300164469	47.5768	0.0198	0.229	0.0267	3.7977	2.66052e-48	SIG
A_SFW	Chr19__144159670	144159670	45.502	-0.1066	-0.2367	0.0241	3.4175	3.15992e-46	SIG
A_SFW	Chr20__53310555	53310555	12.0964	0.0137	-0.1138	0.0053	0.7545	8.01847e-13	SIG
A_SFW	Chr20__160752679	160752679	9.0015	0.0615		0.0038	0.5376	1.20815e-10	SIG
A_SFW	Chr22__201784939	201784939	31.0166	-0.0253	-0.3054	0.0146	2.0811	9.64933e-32	SIG
A_SFW	Chr23__279219985	279219985	20.278	0.0942		0.0089	1.2598	4.31513e-22	SIG
A_SFW	Chr23__294205585	294205585	10.4925	0.0656		0.0043	0.6116	3.62397e-12	SIG
A_SFW	Chr24__260940601	260940601	10.3763	0.0048	-0.1761	0.0043	0.6078	4.20821e-11	SIG
A_SFW	Chr25__187330706	187330706	11.5718	-0.0991	-0.0188	0.0048	0.6792	2.68325e-12	SIG
A_SFW	Chr27__3971712	3971712	9.8845	-0.0965	0.0231	0.0044	0.6187	1.30582e-10	SIG
A_SFW	Chr27__4548450	4548450	15.8177	-0.0904		0.0082	1.1614	1.40548e-17	SIG
A_SFW	Chr27__34606728	34606728	13.5996	0.075		0.0056	0.7999	2.49919e-15	SIG
A_SDW	Chr9__104356885	104356885	20.4108	0.0255		0.0006	2.8872	3.16856e-22	SIG
A_SDW	Chr11__247792277	247792277	7.4627	0.015		0.0002	1.0071	4.56711e-09	SIG
A_SDW	Chr18__5000388	5000388	13.0947	0.0194		0.0004	1.6753	8.13968e-15	SIG
A_SDW	Chr20__155805329	155805329	14.7564	-0.0128	-0.051	0.0005	2.0743	1.75446e-15	SIG
A_SDW	Chr20__174233426	174233426	12.8103	0.0256	0.0084	0.0004	1.573	1.54934e-13	SIG
A_SDW	Chr22__290803142	290803142	6.5144	-0.0132		0.0002	0.7811	4.32275e-08	SIG
A_SDW	Chr23__105458105	105458105	8.6562	-0.0226	0.0007	0.0003	1.223	2.20853e-09	SIG
A_SDW	Chr23__198310209	198310209	8.5956	-0.0153		0.0002	1.0444	3.1442e-10	SIG
A_SDW	Chr23__245651042	245651042	6.8431	-0.0134		0.0002	0.8043	1.98144e-08	SIG
A_SDW	Chr23__288176866	288176866	4.6431	-0.0123		0.0002	0.6699	3.76435e-06	SUG
Note: a Add×Env1, additive×environment interaction effect; b Dom×Env1, dominance×environment interaction effect; c R2, the phenotypic variation explanation; d SIG, significant; SUG, suggestion; QEIs with bold characters appear at least twice in multiple environment analysis.
